# Supplementary material
Source: PubMed Central journal article supplement (PMC11388847)
Supplement: PBI-14-1756-s008.pdf [file PBI-14-1756-s008.pdf]

## Supporting information

### Additional figures

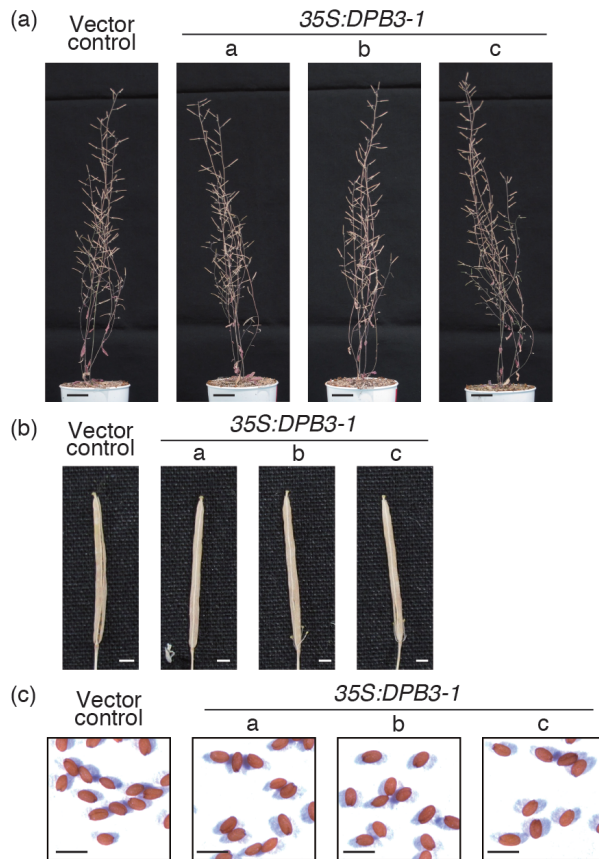

**Figure S1** Phenotypes of the vector control and *DPB3-1*-overexpressing *Arabidopsis* under non-stress conditions after ripening. (a) Aerial parts of the vector control and *DPB3-1*-overexpressing *Arabidopsis* after ripening. Photographs were taken 60-d after sowing. Scale bars represent 1 cm. (b) Siliques of the vector control and *DPB3-1*-overexpressing *Arabidopsis* shown in (a) after ripening. Scale bars represent 1 mm. (c) Mature seeds of the vector control and *DPB3-1*-overexpressing *Arabidopsis* shown in (a). Scale bars represent 1 mm.

```

OsDREB2B2 : MTVDQRTTAKAIMPVVEMPVQVQGRKKRPRRSRDGPTSSVAETIKRWAE LNNQQE LDPQGP 1-60
DREB2A     : MAVYDOSGDR-----NRTQIDTSRKRKRSRSRGDGTVAERLKRWKEYNETVE---EVS 1-50
GmDREB2A   : MGAYDQVSLK-----PLDSSRKRKRSRSRGVGTGSVAETIAKWKEYNEHLYSGKDDSS 1-51

OsDREB2B2 : KKARKAPAKGSKKGCМКGКGGPENLRCDFRGVRQRTWGКWVAEIREPNQOSRLWLGTFFPT 61-120
DREB2A     : TKKRKVPKAGSKKGCМКGКGGPENSRCSFRGVRQRTWGКWVAEIREPNRGSRLWLGTFFPT 51-110
GmDREB2A   : RTTRKAPAKGSKKGCМКGКGGPENSCNYRGVRQRTWGКWVGEIREPNRGSRLWLGTFFSS 52-111

OsDREB2B2 : AEAAACAYDEAARAMYGPMARLNFG 121-145
DREB2A     : AQEAASAYDEAAKAMYGPLARLNFP 111-135
GmDREB2A   : AQEAALAYDEAARAMYGP CARLNFP 112-136

```

**Figure S2** Alignment of DREB2A, OsDREB2B2 and GmDREB2A;2. The sequence of the interacting region of DREB2A with DPB3-1 (1-135 amino acids) was aligned with that of OsDREB2B2 and GmDREB2A;2. The numbers on the right side of the alignment correspond to the actual amino acid numbers of each protein.

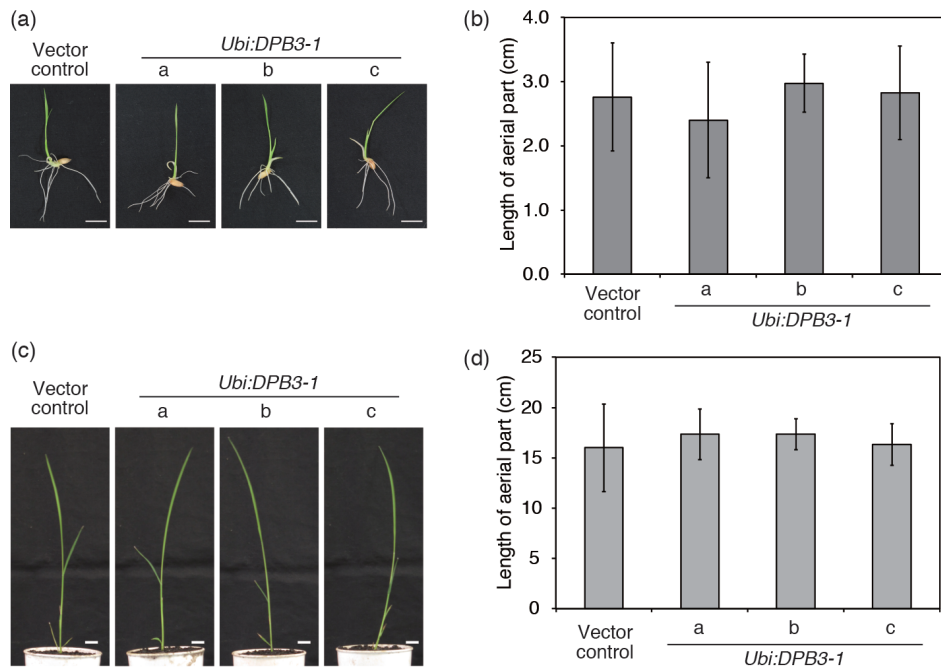

**Figure S3** Additional phenotypic analysis of the *DPB3-1*-overexpressing rice under non-stress conditions. (a, c) Growth of the vector control and *DPB3-1*-overexpressing plants under normal conditions. Photographs of 7-d-old

(a) or 16-d-old (c) plants are shown. Scale bars represent 1 cm. (b, d) Average length of aerial part of the 7-d-old (b) or 16-d-old (d) vector control and *DPB3-1*-overexpressing plants calculated from the plants grown as shown in (a) or (c), respectively. The error bars indicated the SD ( $n = 12$ ). The data were evaluated using one-way ANOVA, and no significant differences were detected ( $P > 0.05$ ).

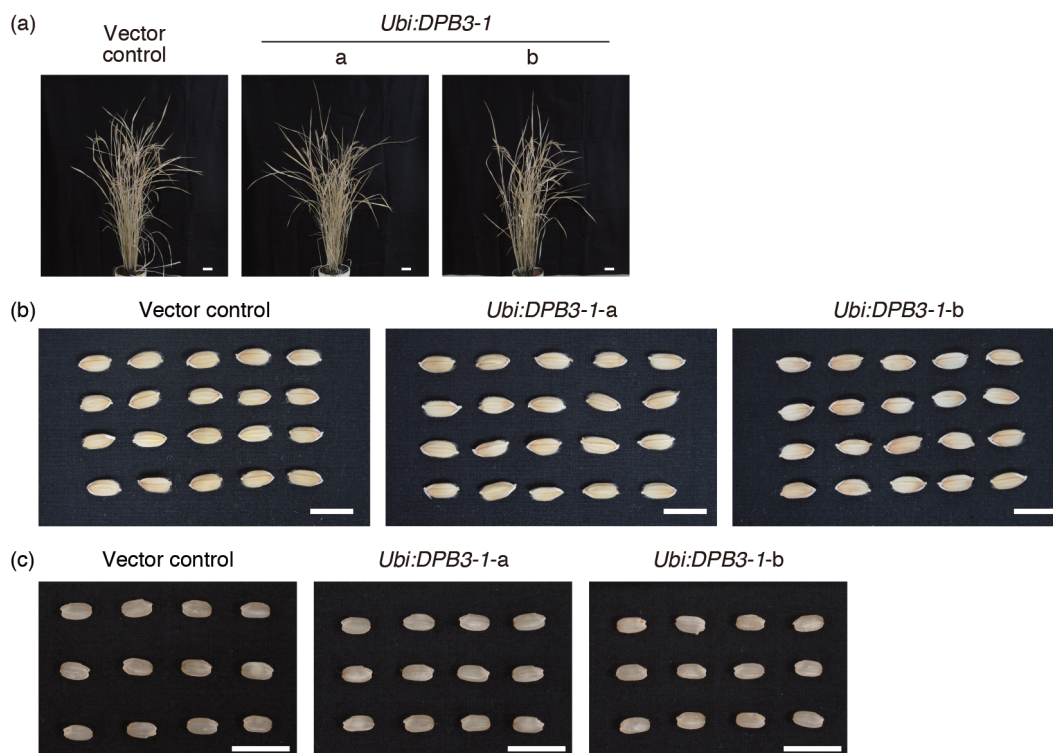

**Figure S4** Plant phenotype and seed morphology of the *DPB3-1*-overexpressing rice after desiccation. (a) Phenotype of the vector control and *DPB3-1*-overexpressing plants after desiccation. The plants were grown under non-stress conditions and photographs were taken about 6 months after germination. Scale bars represent 5 cm. (b, c) Seed morphology of the vector control and *DPB3-1*-overexpressing rice. Photographs of rough rice grains (b) and hulled rice grains without gloms (c) are shown. Scale bars represent 1 cm.

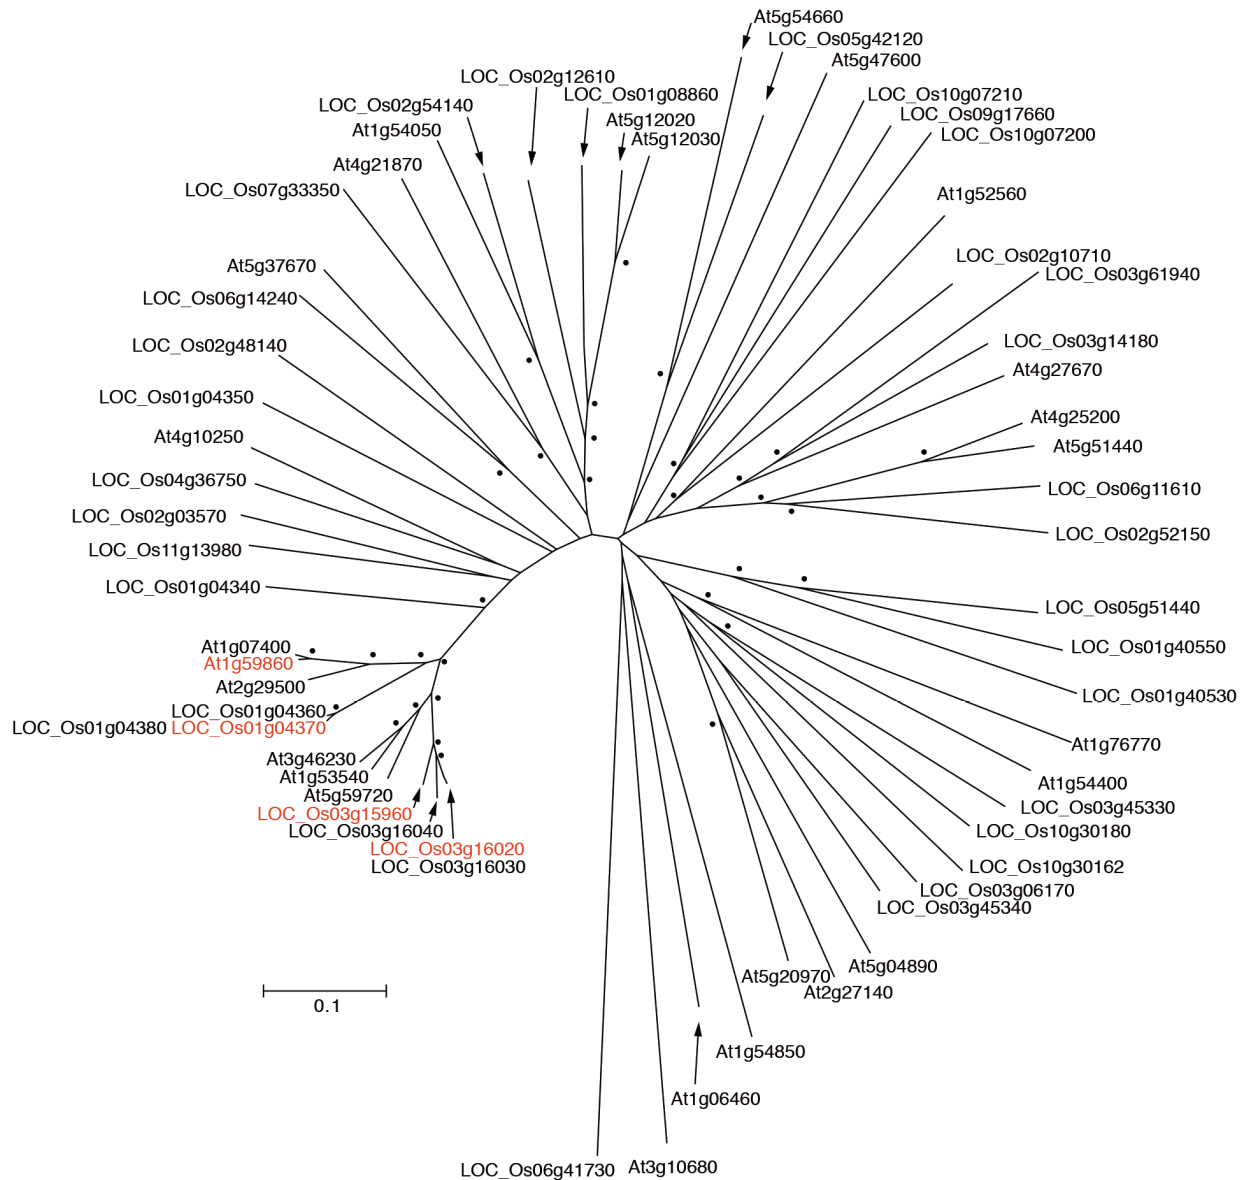

**Figure S5** Phylogenetic tree of HSP20 family proteins in *Arabidopsis thaliana* and *Oryza sativa* based on amino acid sequences of the conserved domain. The peptide sequences of the HSP20 family proteins were obtained from Phytozome (Phytozome v10.1, <http://www.phytozome.net/>) according to the conserved domain (Pfam:00011). A consensus tree from 1000 bootstrap samplings is shown, and a dot indicates a node that was supported with a bootstrap value > 50. The scale bar indicates the substitution rate per residue. AtXgXXXXX and LOC\_OsXXgXXXXX represent *Arabidopsis thaliana* and *Oryza sativa* family proteins, respectively. The candidate target gene of DPB3-1 in

*Arabidopsis* (At1g59860) and the highly conserved proteins in rice whose expression patterns were analyzed in this study were shown in red lettering.

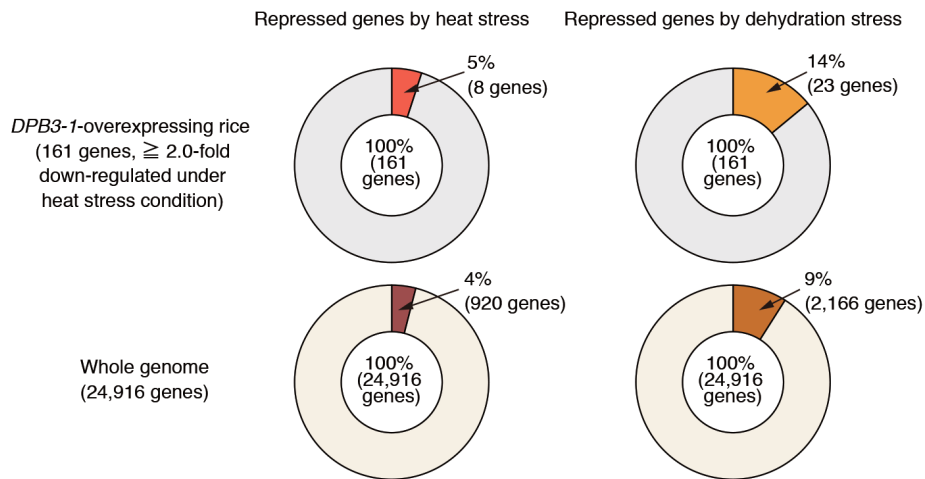

**Figure S6** Proportions of abiotic stress-repressive genes among the downregulated genes in the *DPB3-1*-overexpressing rice under heat stress condition or rice whole genome.

Proportions of abiotic stress-inducible genes were calculated according to the microarray analysis (Table S3) and a previous paper (Maruyama et al., 2012; Venu et al., 2013). There were not the significant differences between the proportions of abiotic stress-inducible genes among the downregulated genes in the *DPB3-1*-overexpressing rice under heat stress condition or rice whole genome ( $P > 0.05$ , Fisher's exact test).

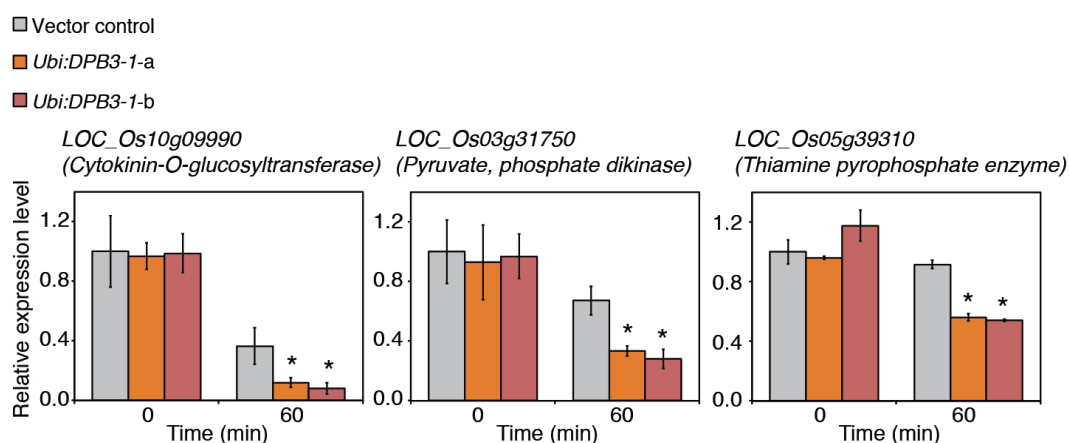

**Figure S7** Confirmation of downregulated gene expression in *Ubi:DPB3-1* identified by microarray analysis. The expression levels of three downregulated genes by the overexpression of *DPB3-1* under heat stress condition were analyzed by quantitative RT-PCR analysis. The expression levels of each gene in the vector control plants were defined as 1.0. The error bars indicated the SD (n = 3). Asterisks indicate significant differences between the plants at each time point ( $P < 0.05$  according to Bonferroni-corrected Student's *t* test).



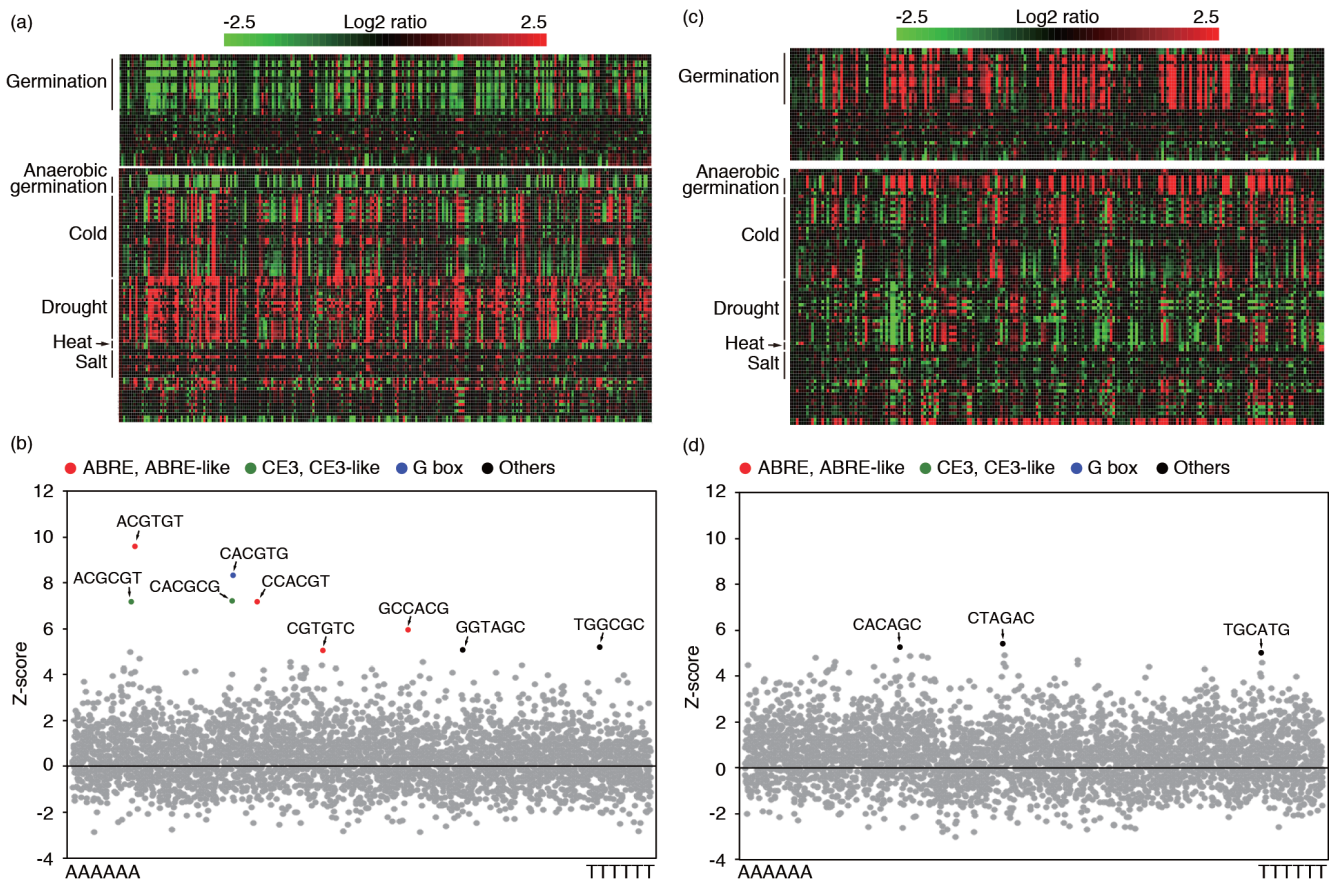

**Figure S8** Microarray analysis of upregulated or downregulated genes in *Ubi:DPB3-1* plants under heat stress conditions. (a, c) Expression profile of the upregulated (a) or downregulated (c) genes in the *DPB3-1*-overexpressing plants under the heat stress condition. The top 100 upregulated genes (x axis, from left to right) under developmental conditions or in response to various abiotic stress (y axis) are shown as heat maps. (b, d) Overrepresentation analysis of hexamer sequences in the promoters of top 100 upregulated (b) or downregulated (d) genes in the *Ubi:DPB3-1* plants under the heat stress condition. Z-scores (y axes) for the observed frequencies of all hexamer sequences (x axes) are shown in the scatter plot. The highly conserved sequences of ABRE or ABRE-like (red), CE3 or CE3-like (green), G box (blue) and others (black) are exhibited (Z-scores > 5).

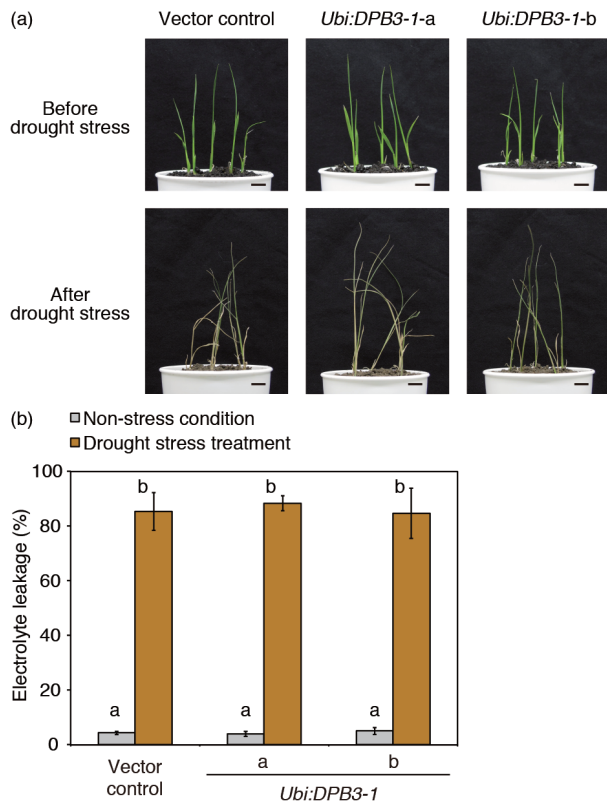

**Figure S9** Drought stress tolerance of the *DPB3-1*-overexpressing rice. (a) Photographs of plants before and after drought stress treatment. The seeds were germinated in water for 7 days at 28°C, and after germination, the seedling were grown on soil for 4 days. After 4 days, water was withheld until wilting. Photographs were taken before stress treatment and 9 days after drought stress. Scale bars represent 1 cm. (b) Electrolyte leakage of plant with or without drought stress treatment. Plants shown in (a) were analyzed as the samples with drought stress treatment. The error bars indicated the SD (n = 10). There were no significant differences between plants with or without heat stress ( $P > 0.05$  according to one-way ANOVA).



## Additional tables

**Table S1** Yield parameters of the vector control and *DPB3-1*-overexpressing *Arabidopsis* under non-stress conditions.

| Traits                          | Vector control (%) | 35S:DPB3-1-a (%) | 35S:DPB3-1-b (%) | 35S:DPB3-1-c (%) |
|---------------------------------|--------------------|------------------|------------------|------------------|
| Silique number per plant        | 107 ± 7 (100)      | 108 ± 9 (101)    | 102 ± 9 (95)     | 103 ± 5 (97)     |
| Seed weight per plant (mg)      | 46.5 ± 5.3 (100)   | 43.2 ± 5.3 (93)  | 52.2 ± 4.1 (112) | 56.6 ± 5.3 (121) |
| Silique length (mm)             | 11.1 ± 1.4 (100)   | 10.5 ± 1.3 (95)  | 10.3 ± 1.1 (93)  | 10.4 ± 1.1 (94)  |
| Seed number per silique         | 43 ± 5 (100)       | 40 ± 5 (93)      | 43 ± 5 (100)     | 40 ± 2 (93)      |
| Seed weight per 1000 seeds (mg) | 15.1 ± 1.4 (100)   | 14.6 ± 1.5 (96)  | 15.8 ± 1.5 (104) | 16.1 ± 0.4 (106) |

Various parameters involved in the yield were measured. Values are the means and SD (n = 15). Relative percentages are shown in brackets. The data were evaluated using one-way ANOVA, and no significant differences were detected (P > 0.05).

**Table S2** Number of *cis* elements on the promoters of genes which expression levels were analyzed in Figure 6.

| Gene code      | Annotation   | DRE | CCAAT | HSE | ABRE |
|----------------|--------------|-----|-------|-----|------|
| LOC_Os02g32590 | OsHsfA3      | 1   | 0     | 0   | 1    |
| LOC_Os03g53340 | OsHsfA2a     | 0   | 2     | 5   | 1    |
| LOC_Os01g39020 | OsHsfA7      | 0   | 2     | 0   | 1    |
| LOC_Os03g12370 | OsHsfA9      | 4   | 2     | 0   | 1    |
| LOC_Os01g04370 | HSP20 family | 0   | 1     | 1   | 1    |
| LOC_Os03g15960 | HSP20 family | 3   | 3     | 1   | 0    |
| LOC_Os03g16020 | HSP20 family | 0   | 1     | 2   | 2    |
| LOC_Os05g27930 | OsDREB2B     | 1   | 2     | 2   | 0    |

The sequences of 1-kb promoters of each gene were obtained from Phytozome (Phytozome v10.1, <http://www.phytozome.net/>). The numbers of DRE (A/GCCGAC), CCAAT, HSE (GAAnnTTC; “n” means an arbitrary nucleotide)

and ABRE (ACGTGG/T) on the 1-kb promoters are shown.

**Table S3** Upregulated genes in the vector control rice under the heat stress condition.

This table is uploaded as an individual file because of the size.

**Table S4** Downregulated genes in the vector control rice under the heat stress condition.

This table is uploaded as an individual file because of the size.

**Table S5** Downregulated gene in *DPB3-1*-overexpressing rice under the non-stress condition.

| MSU7_locus     | Fold Change | Q-Value | Average (log2) | SD (log2) | Regulation | Description <sup>a)</sup> |
|----------------|-------------|---------|----------------|-----------|------------|---------------------------|
| LOC_Os05g08910 | 3.8         | 0.04004 | -1.9           | 0.1       | down       | expressed protein         |

<sup>a)</sup> Description as given by the MSU 7.0 database.

**Table S6** Upregulated gene in *DPB3-1*-overexpressing rice under the heat stress condition.

This table is uploaded as an individual file because of the size.

**Table S7** Downregulated gene in *DPB3-1*-overexpressing rice under the heat stress condition.

This table is uploaded as an individual file because of the size.

**Table S8** GO analysis of the genes upregulated in the *DPB3-1*-overexpressing plants under the heat stress condition.

| Term                             | Background frequency | Sample frequency | P-value  |
|----------------------------------|----------------------|------------------|----------|
| Cation transport (GO:0006812)    | 529                  | 11               | 4.68E-04 |
| Ion transport (GO:0006811)       | 798                  | 13               | 6.08E-04 |
| Response to heat (GO:0009408)    | 122                  | 6                | 2.04E-03 |
| Metal ion transport (GO:0030001) | 348                  | 8                | 9.73E-03 |

GO analysis was performed using GO Term Enrichment tool on Gene Ontology Consortium (<http://geneontology.org/>). The terms that are significantly enriched compared with the entire *Oryza sativa* genes are listed ( $P < 0.01$ ). The background frequency and sample frequency refer to the number of genes in the categories among the total *Oryza sativa* genes and upregulated genes in the *DPB3-1*-overexpressing plants, respectively.

**Table S9** GO analysis of the genes downregulated in the *DPB3-1*-overexpressing plants under the heat stress condition.

| Term                                                         | Background frequency | Sample frequency | P-value  |
|--------------------------------------------------------------|----------------------|------------------|----------|
| Metabolic process (GO:0008152)                               | 16691                | 84               | 1.43E-15 |
| Biological_process (GO:0008150)                              | 20954                | 92               | 4.42E-14 |
| Primary metabolic process (GO:0044238)                       | 11238                | 53               | 3.87E-06 |
| Organic substance metabolic process (GO:0071704)             | 11638                | 54               | 4.48E-06 |
| Carbohydrate metabolic process (GO:0005975)                  | 1383                 | 16               | 7.48E-05 |
| Phosphorylation (GO:0016310)                                 | 2440                 | 20               | 3.82E-04 |
| Phosphate-containing compound metabolic process (GO:0006796) | 3375                 | 23               | 1.10E-03 |
| Phosphorus metabolic process (GO:0006793)                    | 3401                 | 23               | 1.26E-03 |
| Protein phosphorylation (GO:0006468)                         | 1949                 | 17               | 1.44E-03 |
| Cellular metabolic process (GO:0044237)                      | 10346                | 43               | 8.34E-03 |

GO analysis was performed using GO Term Enrichment tool on Gene Ontology Consortium (<http://geneontology.org/>). The terms that are significantly enriched

compared with the entire *Oryza sativa* genes are listed ( $P < 0.01$ ). The background frequency and sample frequency refer to the number of genes in the categories among the total *Oryza sativa* genes and downregulated genes in the *DPB3-1*-overexpressing plants, respectively.

**Table S10** Overrepresentation analysis of DRE, CCAAT and HSE sequences in the promoters of the top 100 upregulated genes in *Ubi:DPB3-1* rice under the heat stress condition.

| <i>cis</i> element | Sequence  | Fold change | Z-score  | P-value |
|--------------------|-----------|-------------|----------|---------|
| DRE                | ACCGAC    | 1.81        | 3.10540  | 0.00095 |
| DRE                | GCCGAC    | 1.35        | 1.35487  | 0.08773 |
| DRE                | GTCGGT    | 1.18        | 0.57578  | 0.28238 |
| DRE                | GTCGGC    | 1.00        | 0.01082  | 0.49568 |
| CCAAT              | CCAAT     | 1.11        | 1.07005  | 0.14230 |
| CCAAT              | ATTGG     | 1.00        | -0.00477 | 0.50190 |
| HSE                | GAANN TTC | 1.12        | 0.71549  | 0.23715 |

The results of the frequency of each DRE (A/GCCGAC) motif were extracted from the overrepresentation analysis of all hexamer sequences shown in Figure S8b, and the frequency of CCAAT and HSE (GAAnnTTC) motifs in the promoter sequences encompassing 1000 bp before each transcriptional start site of the top 100 upregulated genes in *Ubi:DPB3-1* rice under the heat stress condition were compared with that in the 100 randomly selected promoters from the entire rice genome. Statistic analysis was performed similarly to the overrepresentation analysis of all hexamer sequences.

**Table S11** Sequences of primers used in this study.

| Target gene                        | Locus ID       | Oligonucleotide name  | Sequence (5' to 3')               |
|------------------------------------|----------------|-----------------------|-----------------------------------|
| Primers used for cloning of coding |                |                       |                                   |
| <i>AtDPB3-1</i>                    | At1g07980      | NFYC10_5'_BamHI       | ATGGATCCATGGTGTCTGTCAAAAGAA       |
|                                    |                | NFYC10_3'_NotI        | ATGCGGCCGCTCAGCCTGCATCTGTCAT      |
| <i>OsDREB2B2</i>                   | LOC_Os05g27930 | OsDREB2B_5'_EcoRI     | TAGAATTCATGACGGTGGATCAGAGGACG     |
|                                    |                | OsDREB2B_AP2_3'_BamHI | ATGGATCCGCCAAAATTAGTGGCAGC        |
|                                    |                | OsDREB2B_5'_ClaI      | TAATCGATATGACGGTGGATCAGAGGACG     |
|                                    |                | OsDREB2B_3'_XhoI_ns   | ATCTCGAGTCCCAAGCCCTCAAAGAAGCTG    |
| <i>GmDREB2A</i>                    | Glyma14g06080  | GmDREB2A_5'_EcoRI     | GCGAATTCATGGGTGCTTATGATCAAGTTTC   |
|                                    |                | GmDREB2A-AP2_3'_BamHI | ATGGATCCTTTGGGAAAATTGAGGCGTG      |
|                                    |                | GmDREB2A_5'_ClaI      | GCATCGATATGGGTGCTTATGATCAAGTTTC   |
|                                    |                | GmDREB2A_3'_XhoI_ns   | ATCTCGAGCTAGCCACCCTTCCTTGCTT      |
| <i>OsDPB3-2</i>                    | LOC_Os03g63530 | OsDPB3-2_5'_ClaI      | ATATCGATATGGCCGGAAGAAGAAGGCC      |
|                                    |                | OsDPB3-2_3'_XhoI_ns   | ATCTCGAGTAATTGTGGTTGGTTCACCTGGCTG |
|                                    |                | OsDPB3-2_5'_XbaI      | ATTCTAGAGATGGCCGGAAGAAGAAGGCCCTAA |
|                                    |                | OsDPB3-2_3'_XhoI      | CGCTCGAGTTATTGTGGTTGGTTCACCTGGCTG |
| Primers used for qRT-PCR           |                |                       |                                   |
| <i>OsDPB3-2</i>                    | LOC_Os03g63530 | OsDPB3-2_rt_5         | ATCAACAAGCCACCGAGATATT            |
|                                    |                | OsDPB3-2_rt_3         | GCACACTGCTGTTGAAAGGTTAT           |
| <i>OsHsfA3</i>                     | LOC_Os02g32590 | OsHsfA3_rt_5          | GCTGCCAGAGAACATAGGACTT            |
|                                    |                | OsHsfA3_rt_3          | CAAGTTCCTCTGTGTGTCAAA             |
| <i>OsHsfA2a</i>                    | LOC_Os03g53340 | OsHsfA2a_rt_5         | GCGTCCAGGAGAGTAACAGC              |
|                                    |                | OsHsfA2a_rt_3         | GGGGCTGAGGTGATATATGCT             |
| <i>OsHsfA7</i>                     | LOC_Os01g39020 | OsHsfA7_rt_5          | CCAATGTGCAATTTCCAGAATA            |
|                                    |                | OsHsfA7_rt_3          | TCCATTCCAGTTTCAGGTAAGG            |
| <i>OsHsfA9</i>                     | LOC_Os03g12370 | OsHsfA9_rt_5          | CCCTCCTTTGAGTGTCAAGAT             |
|                                    |                | OsHsfA9_rt_3          | TCAAGCTTCGGTAATGACATC             |
| <i>HSP20</i> family gene           | LOC_Os01g04370 | LOC_Os01g04370_rt_5   | GGTGAGGGAAGAAGTCATGTTT            |
|                                    |                | LOC_Os01g04370_rt_3   | ACACCAGCAGCAGACCATACT             |
| <i>HSP20</i> family gene           | LOC_Os03g15960 | LOC_Os03g15960.1_rt_5 | TCTGTCGTGAAGGAGCAAATAA            |
|                                    |                | LOC_Os03g15960.1_rt_3 | AACAACACACTGACCCAGTGAC            |
| <i>HSP20</i> family gene           | LOC_Os03g16020 | LOC_Os03g16020.1_rt_5 | TACTGGTGTTTTTGGTGTGCTC            |

|                                        |                |                       |                         |
|----------------------------------------|----------------|-----------------------|-------------------------|
|                                        |                | LOC_Os03g16020.1_rt_3 | TGAGACAACAGGTTTTACCGTTT |
| <i>OsDREB2B1</i>                       | LOC_Os05g27930 | OsDREB2B1_rt_5        | TCCAGCCCGGAAGAAAATGT    |
| <i>OsDREB2B2</i>                       | LOC_Os05g27930 | OsDREB2B2_rt_5        | CAGCCCGGAAGGAAAAAGCG    |
|                                        |                | OsDREB2B2_rt_3        | GCTCCTGCTGATTGTTGAGC    |
| <i>HSP20</i> family gene               | LOC_Os02g48140 | LOC_Os02g48140_rt_5   | TAGTACATGTCAAGCCTACCCG  |
|                                        |                | LOC_Os02g48140_rt_3   | AAGTGCACTCATGCGCCATA    |
| <i>HSP20</i> family gene               | LOC_Os03g14180 | LOC_Os03g14180_rt_5   | ATTGAAGCAAGCAATCAAGCGA  |
|                                        |                | LOC_Os03g14180_rt_3   | GAACCTAAAAGCAGTGAGCTGG  |
| <i>Chaperone protein</i>               | LOC_Os03g31300 | LOC_Os03g31300_rt_5   | ATTTCAAGGACGAGGACAGCAT  |
|                                        |                | LOC_Os03g31300_rt_3   | TGGAAAACGAGCTTTTGCTGAG  |
| <i>MYB</i> family gene                 | LOC_Os05g37060 | LOC_Os05g37060_rt_5   | GCTATCTAAGCACCGGCATTG   |
|                                        |                | LOC_Os05g37060_rt_3   | TCTCTCACACTCAGATTCGC    |
| <i>Leucine zipper</i> family gene      | LOC_Os02g43330 | LOC_Os02g43330_rt_5   | AGCTAGACGGGAGAGCAGATTA  |
|                                        |                | LOC_Os02g43330_rt_3   | TGCATGTGTGGATTTGCATTGT  |
| <i>bZIP</i> family gene                | LOC_Os07g08420 | LOC_Os07g08420_rt_5   | ATGGCAGACATTGAAGCCCTAA  |
|                                        |                | LOC_Os07g08420_rt_3   | ACATTGAGGGGAGATTGCATGT  |
| <i>Cytokinin-O-glucosyltransferase</i> | LOC_Os10g09990 | LOC_Os10g09990_rt_5   | CAGATCCTGCCTTGTGAGTACA  |
|                                        |                | LOC_Os10g09990_rt_3   | TGTAACAACCTAAATGTGCGCT  |
| <i>Pyruvate, phosphate dikinase</i>    | LOC_Os03g31750 | LOC_Os03g31750_rt_5   | AGAGGATGTTGGTGGCATGAAT  |
|                                        |                | LOC_Os03g31750_rt_3   | CCACACAACATTTTCCCATCC   |
| <i>Thiamine pyrophosphate enzyme</i>   | LOC_Os05g39310 | LOC_Os05g39310_rt_5   | ATGGAGCTTGCCTGGTTG      |
|                                        |                | LOC_Os05g39310_rt_3   | GGTTGATGACGGCGTTGGAG    |
| <i>18S rRNA</i>                        |                | 18S rRNA_RT-PCR_F     | AAACGGCTACCACATCCAAG    |
|                                        |                | 18S rRNA_RT-PCR_R     | CCTCCAATGGATCCTCGTTA    |

---



## Procedures of supporting experiments

### Plant material and growth conditions of *Arabidopsis thaliana*

*Arabidopsis thaliana* ecotype Columbia plants were grown under control condition as previously described (Sato et al., 2014). The transgenic *Arabidopsis* overexpressing *AtDPB3-1* was used as described in the paper.

### Sequence alignment and phylogenetic analysis

The peptide sequences of each protein were obtained from Phytozome (Phytozome v10.1, <http://www.phytozome.net/>). Alignment of the family proteins and construction of the neighbor-joining phylogenetic tree performed as described previously (Sato et al., 2014).

### Analysis of microarray data

Meta-profile analysis of microarray data was performed using the public microarray database Genevestigator (Hruz et al., 2008). Overrepresentation analysis of hexamers in the promoters of up- or down-regulated genes was performed as described previously (Maruyama et al., 2012) using 1-kb upstream sequences from the translational start sites.

### Drought stress treatment

The seeds were germinated in water for 7 days at 28°C, and the seedling were grown on soil for 4 days. After 4 days, water was withheld until wilting for 9 to 11 days.

### Construct generation

For yeast two-hybrid assays, fragments of *OsDREB2B2* and *GmDREB2A;2* coding sequence were cloned into *EcoRI* and *BamHI* sites of the pGBKT7 vector (Clontech). The pGADT7 vector harboring the *DPB3-1* coding sequence was used previously (Sato et al., 2014).

For GFP fluorescence observation, *OsDPB3-2* coding sequence was cloned into *XbaI* and *XhoI* sites of the pGKX-NsGFP vector (Qin et al., 2008).

For BiFC assays, coding sequences of *OsDREB2B2* and *GmDREB2A;2* were cloned into *Clal* and *XhoI* sites of the pUCSPYCE vector (Qin et al., 2008), and coding sequence to *OsDPB3-2* was cloned into *Clal* and *XhoI* sites of pUCSPYNE vector (Qin et al., 2008). The pUCSPYCE and pGKX-NsGFP vector harboring the *DPB3-1* coding sequence was used previously (Sato et al., 2014).

For transactivation assays, *OsDPB3-2* coding sequence was cloned into *XbaI* and *XhoI* sites of the pGKX vector (Qin et al., 2008). Other constructs used for transactivation assays were described in previous papers (Matsukura et al., 2010; Mizoi et al., 2013; Sato et al., 2014).

To generate the *Ubi:DPB3-1* constructs, the *DPB3-1* coding sequence was inserted into the *BamHI* and *NotI* sites of the pGHU vector (Matsukura et al., 2010).

## Supporting reference

- Hruz, T., Laule, O., Szabo, G., Wessendorp, F., Bleuler, S., Oertle, L., Widmayer, P., Gruissem, W. and Zimmermann, P. (2008) Genevestigator v3: a reference expression database for the meta-analysis of transcriptomes. *Adv Bioinformatics* **2008**, 420747.
- Maruyama, K., Todaka, D., Mizoi, J., Yoshida, T., Kidokoro, S., Matsukura, S., Takasaki, H., Sakurai, T., Yamamoto, Y.Y., Yoshiwara, K., Kojima, M., Sakakibara, H., Shinozaki, K. and Yamaguchi-Shinozaki, K. (2012) Identification of cis-acting promoter elements in cold- and dehydration-induced transcriptional pathways in Arabidopsis, rice, and soybean. *DNA Res* **19**, 37-49.
- Matsukura, S., Mizoi, J., Yoshida, T., Todaka, D., Ito, Y., Maruyama, K., Shinozaki, K. and Yamaguchi-Shinozaki, K. (2010) Comprehensive analysis of rice DREB2-type genes that encode transcription factors involved in the expression of abiotic stress-responsive genes. *Mol Genet Genomics* **283**, 185-196.
- Mizoi, J., Ohori, T., Moriwaki, T., Kidokoro, S., Todaka, D., Maruyama, K., Kusakabe, K., Osakabe, Y., Shinozaki, K. and Yamaguchi-Shinozaki, K. (2013) GmDREB2A;2, a canonical DEHYDRATION-RESPONSIVE ELEMENT-BINDING PROTEIN2-type transcription factor in soybean, is posttranslationally regulated and mediates dehydration-responsive element-dependent gene expression. *Plant Physiol* **161**, 346-361.
- Qin, F., Sakuma, Y., Tran, L.S., Maruyama, K., Kidokoro, S., Fujita, Y., Fujita, M., Umezawa, T., Sawano, Y., Miyazono, K., Tanokura, M., Shinozaki, K. and Yamaguchi-Shinozaki, K. (2008) Arabidopsis DREB2A-interacting proteins function as RING E3 ligases and negatively regulate plant drought stress-responsive gene expression. *Plant Cell* **20**, 1693-1707.
- Sato, H., Mizoi, J., Tanaka, H., Maruyama, K., Qin, F., Osakabe, Y., Morimoto, K., Ohori, T., Kusakabe, K., Nagata, M., Shinozaki, K. and Yamaguchi-Shinozaki, K. (2014) Arabidopsis DPB3-1, a DREB2A interactor, specifically enhances heat stress-induced gene expression by forming a heat stress-specific transcriptional complex with NF-Y subunits.

*Plant Cell* **26**, 4954-4973.

Venu, R.-C., Sreerekha, M.V., Madhav, M.S., Nobuta, K., Mohan, K.M., Chen, S., Jia, Y., Meyers, B.C. and Wang, G.-L. (2013) Deep transcriptome sequencing reveals the expression of key functional and regulatory genes involved in the abiotic stress signaling pathways in rice. *Journal of Plant Biology* **56**, 216-231.
