# Supplementary material
Source: PubMed Central journal article supplement (PMC11388847)
Supplement: PBI-14-1756-s009.pdf [file PBI-14-1756-s009.pdf]

**Table S3** Upregulated genes in the vector control rice under the heat stress condition.

<sup>a</sup> Description as given by the MSU 7.0 database.

| MSU7_locus     | Fold Change | Q-Value | Average (log2) | SD (log2) | Regulation | Description <sup>a</sup>                                                                            |
|----------------|-------------|---------|----------------|-----------|------------|-----------------------------------------------------------------------------------------------------|
| LOC_Os02g15930 | 207.0       | 0.00029 | 7.7            | 0.0       | up         | expressed protein                                                                                   |
| LOC_Os04g28420 | 128.7       | 0.00067 | 7.0            | 0.2       | up         | peptidyl-prolyl isomerase, putative, expressed                                                      |
| LOC_Os04g45480 | 70.9        | 0.00065 | 6.1            | 0.1       | up         | heat shock protein ST1, putative, expressed                                                         |
| LOC_Os06g36930 | 48.7        | 0.00079 | 5.6            | 0.2       | up         | HSF-type DNA-binding domain containing protein, expressed                                           |
| LOC_Os03g14180 | 45.9        | 0.00147 | 5.5            | 0.3       | up         | hsp20/alpha crystallin family protein, putative, expressed                                          |
| LOC_Os10g28340 | 29.3        | 0.00060 | 4.9            | 0.1       | up         | heat stress transcription factor, putative, expressed                                               |
| LOC_Os02g40900 | 28.6        | 0.00029 | 4.8            | 0.0       | up         | RNA recognition motif containing protein, putative, expressed                                       |
| LOC_Os03g61150 | 28.2        | 0.00081 | 4.8            | 0.2       | up         | expressed protein                                                                                   |
| LOC_Os08g43334 | 28.0        | 0.00057 | 4.8            | 0.1       | up         | HSF-type DNA-binding domain containing protein, expressed                                           |
| LOC_Os01g46740 | 26.9        | 0.00148 | 4.7            | 0.3       | up         | expressed protein                                                                                   |
| LOC_Os03g49430 | 25.4        | 0.00113 | 4.7            | 0.2       | up         | pre-mRNA-splicing factor, putative, expressed                                                       |
| LOC_Os06g36390 | 24.4        | 0.00083 | 4.6            | 0.1       | up         | expressed protein                                                                                   |
| LOC_Os01g42190 | 23.8        | 0.00080 | 4.6            | 0.1       | up         | heat shock protein DnaJ, putative, expressed                                                        |
| LOC_Os03g19270 | 22.4        | 0.00120 | 4.5            | 0.2       | up         | universal stress protein domain containing protein, putative, expressed                             |
| LOC_Os05g44340 | 22.0        | 0.00234 | 4.5            | 0.4       | up         | heat shock protein 101, putative, expressed                                                         |
| LOC_Os06g06490 | 20.9        | 0.00057 | 4.4            | 0.1       | up         | U-box domain containing heat shock protein, putative, expressed                                     |
| LOC_Os03g18200 | 20.5        | 0.00047 | 4.4            | 0.0       | up         | heat shock protein DnaJ, putative, expressed                                                        |
| LOC_Os11g47500 | 18.7        | 0.00064 | 4.2            | 0.1       | up         | glycosyl hydrolase, putative, expressed                                                             |
| LOC_Os02g09880 | 18.3        | 0.00200 | 4.2            | 0.3       | up         | hypothetical protein                                                                                |
| LOC_Os06g39240 | 18.3        | 0.00135 | 4.2            | 0.2       | up         | endothelial differentiation-related factor 1, putative, expressed                                   |
| LOC_Os07g37280 | 18.2        | 0.00326 | 4.2            | 0.4       | up         | hypothetical protein                                                                                |
| LOC_Os12g36840 | 18.2        | 0.00133 | 4.2            | 0.2       | up         | pathogenesis-related Bet v I family protein, putative, expressed                                    |
| LOC_Os03g11910 | 17.5        | 0.00079 | 4.1            | 0.1       | up         | DnaK family protein, putative, expressed                                                            |
| LOC_Os02g54140 | 17.0        | 0.00207 | 4.1            | 0.3       | up         | hsp20/alpha crystallin family protein, putative, expressed                                          |
| LOC_Os02g48140 | 16.9        | 0.00286 | 4.1            | 0.4       | up         | hsp20/alpha crystallin family protein, putative, expressed                                          |
| LOC_Os06g14240 | 16.5        | 0.00235 | 4.0            | 0.3       | up         | hsp20/alpha crystallin family protein, putative, expressed                                          |
| LOC_Os01g68960 | 16.5        | 0.00086 | 4.0            | 0.1       | up         | expressed protein                                                                                   |
| LOC_Os04g33115 | 15.8        | 0.00062 | 4.0            | 0.1       | up         | expressed protein                                                                                   |
| LOC_Os01g55270 | 15.6        | 0.00026 | 4.0            | 0.0       | up         | SGS domain containing protein, expressed                                                            |
| LOC_Os04g36750 | 15.6        | 0.00245 | 4.0            | 0.3       | up         | hsp20/alpha crystallin family protein, putative, expressed                                          |
| LOC_Os12g05210 | 15.1        | 0.00130 | 3.9            | 0.2       | up         | expressed protein                                                                                   |
| LOC_Os03g51920 | 14.8        | 0.00365 | 3.9            | 0.4       | up         | peptidase, M50 family, putative, expressed                                                          |
| LOC_Os06g09560 | 14.6        | 0.00206 | 3.9            | 0.3       | up         | heat shock protein DnaJ, putative, expressed                                                        |
| LOC_Os02g08490 | 14.6        | 0.00151 | 3.9            | 0.2       | up         | chaperone protein clpB 1, putative, expressed                                                       |
| LOC_Os06g39370 | 14.4        | 0.00145 | 3.9            | 0.2       | up         | OsFBK16 - F-box domain and kelch repeat containing protein, expressed                               |
| LOC_Os03g16460 | 13.0        | 0.00062 | 3.7            | 0.1       | up         | expressed protein                                                                                   |
| LOC_Os01g12820 | 12.9        | 0.00131 | 3.7            | 0.2       | up         | harpin-induced protein, putative, expressed                                                         |
| LOC_Os08g03420 | 12.7        | 0.00067 | 3.7            | 0.1       | up         | kelch repeat protein, putative, expressed                                                           |
| LOC_Os08g05590 | 12.6        | 0.00173 | 3.7            | 0.2       | up         | aquaporin protein, putative, expressed                                                              |
| LOC_Os06g46900 | 12.5        | 0.00071 | 3.6            | 0.1       | up         | phosphosulfolactate synthase-related protein, putative, expressed                                   |
| LOC_Os02g53250 | 12.4        | 0.00064 | 3.6            | 0.1       | up         | expressed protein                                                                                   |
| LOC_Os09g25945 | 12.3        | 0.00129 | 3.6            | 0.2       | up         | expressed protein                                                                                   |
| LOC_Os06g32650 | 11.9        | 0.00126 | 3.6            | 0.2       | up         | expressed protein                                                                                   |
| LOC_Os05g45020 | 11.6        | 0.00112 | 3.5            | 0.2       | up         | zinc finger/CCCH transcription factor, putative, expressed                                          |
| LOC_Os09g33820 | 11.5        | 0.00081 | 3.5            | 0.1       | up         | lecithine cholesterol acyltransferase, putative, expressed                                          |
| LOC_Os03g56540 | 11.5        | 0.00137 | 3.5            | 0.2       | up         | heat shock protein DnaJ, putative, expressed                                                        |
| LOC_Os08g39560 | 11.4        | 0.00200 | 3.5            | 0.3       | up         | OTU-like cysteine protease family protein, putative, expressed                                      |
| LOC_Os06g04240 | 11.1        | 0.00114 | 3.5            | 0.2       | up         | expressed protein                                                                                   |
| LOC_Os03g55670 | 10.9        | 0.00095 | 3.4            | 0.1       | up         | expressed protein                                                                                   |
| LOC_Os01g08860 | 10.9        | 0.00924 | 3.4            | 0.7       | up         | hsp20/alpha crystallin family protein, putative, expressed                                          |
| LOC_Os01g19820 | 10.8        | 0.00065 | 3.4            | 0.1       | up         | universal stress protein domain containing protein, putative, expressed                             |
| LOC_Os04g54210 | 10.8        | 0.00098 | 3.4            | 0.1       | up         | expressed protein                                                                                   |
| LOC_Os08g24400 | 10.8        | 0.00163 | 3.4            | 0.2       | up         | SWP, putative, expressed                                                                            |
| LOC_Os01g52140 | 10.8        | 0.00088 | 3.4            | 0.1       | up         | expressed protein                                                                                   |
| LOC_Os03g13450 | 10.6        | 0.00071 | 3.4            | 0.1       | up         | expressed protein                                                                                   |
| LOC_Os11g47510 | 10.6        | 0.00074 | 3.4            | 0.1       | up         | glycosyl hydrolase, putative, expressed                                                             |
| LOC_Os01g52110 | 10.6        | 0.00204 | 3.4            | 0.3       | up         | RING finger and CHY zinc finger domain-containing protein 1, putative, expressed                    |
| LOC_Os06g09550 | 10.4        | 0.00090 | 3.4            | 0.1       | up         | expressed protein                                                                                   |
| LOC_Os09g28210 | 10.2        | 0.00200 | 3.4            | 0.3       | up         | bHelix-loop-helix transcription factor, putative, expressed                                         |
| LOC_Os07g43740 | 9.8         | 0.00519 | 3.3            | 0.5       | up         | zinc finger, C3HC4 type domain containing protein, expressed                                        |
| LOC_Os05g48810 | 9.7         | 0.00148 | 3.3            | 0.2       | up         | dnaJ domain containing protein, expressed                                                           |
| LOC_Os02g34250 | 9.7         | 0.00151 | 3.3            | 0.2       | up         | expressed protein                                                                                   |
| LOC_Os06g06400 | 9.6         | 0.00173 | 3.3            | 0.2       | up         | NBS-LRR type disease resistance protein, putative, expressed                                        |
| LOC_Os03g02300 | 9.5         | 0.00062 | 3.2            | 0.1       | up         | expressed protein                                                                                   |
| LOC_Os03g60560 | 9.3         | 0.00095 | 3.2            | 0.1       | up         | ZOS3-21 - C2H2 zinc finger protein, expressed                                                       |
| LOC_Os02g32770 | 9.3         | 0.00464 | 3.2            | 0.4       | up         | cytochrome P450, putative, expressed                                                                |
| LOC_Os11g15060 | 9.1         | 0.00099 | 3.2            | 0.1       | up         | SAM dependent carboxyl methyltransferase, putative, expressed                                       |
| LOC_Os02g04650 | 9.1         | 0.00057 | 3.2            | 0.1       | up         | activator of 90 kDa heat shock protein ATPase homolog, putative, expressed                          |
| LOC_Os01g21120 | 9.1         | 0.00062 | 3.2            | 0.1       | up         | AP2 domain containing protein, expressed                                                            |
| LOC_Os06g03520 | 9.0         | 0.00179 | 3.2            | 0.2       | up         | DUF581 domain containing protein, expressed                                                         |
| LOC_Os04g58280 | 8.6         | 0.00192 | 3.1            | 0.2       | up         | stem-specific protein TSJT1, putative, expressed                                                    |
| LOC_Os03g55770 | 8.5         | 0.00086 | 3.1            | 0.1       | up         | expressed protein                                                                                   |
| LOC_Os03g58890 | 8.5         | 0.00121 | 3.1            | 0.1       | up         | oxidoreductase, putative, expressed                                                                 |
| LOC_Os02g49720 | 8.3         | 0.01154 | 3.1            | 0.7       | up         | aldehyde dehydrogenase, putative, expressed                                                         |
| LOC_Os05g45830 | 8.2         | 0.00108 | 3.0            | 0.1       | up         | expressed protein                                                                                   |
| LOC_Os01g65830 | 8.2         | 0.00037 | 3.0            | 0.0       | up         | acyl-desaturase, chloroplast precursor, putative, expressed                                         |
| LOC_Os01g67150 | 8.2         | 0.00057 | 3.0            | 0.0       | up         | expressed protein                                                                                   |
| LOC_Os03g08460 | 8.1         | 0.00101 | 3.0            | 0.1       | up         | AP2 domain containing protein, expressed                                                            |
| LOC_Os05g43040 | 8.1         | 0.00071 | 3.0            | 0.1       | up         | tetratricopeptide repeat domain containing protein, expressed                                       |
| LOC_Os04g55170 | 8.1         | 0.00132 | 3.0            | 0.2       | up         | LTPL126 - Protease inhibitor/seed storage/LTP family protein precursor, expressed                   |
| LOC_Os02g43330 | 8.1         | 0.00124 | 3.0            | 0.1       | up         | homeobox associated leucine zipper, putative, expressed                                             |
| LOC_Os03g60780 | 8.0         | 0.00069 | 3.0            | 0.1       | up         | armadillo/beta-catenin-like repeat containing protein, expressed                                    |
| LOC_Os11g31060 | 8.0         | 0.00394 | 3.0            | 0.4       | up         | IQ calmodulin-binding and BAG domain containing protein, putative, expressed                        |
| LOC_Os08g37470 | 8.0         | 0.00349 | 3.0            | 0.3       | up         | 2-aminoethanethiol dioxygenase, putative, expressed                                                 |
| LOC_Os09g23595 | 7.9         | 0.00179 | 3.0            | 0.2       | up         | expressed protein                                                                                   |
| LOC_Os06g05420 | 7.8         | 0.00089 | 3.0            | 0.1       | up         | expressed protein                                                                                   |
| LOC_Os08g40690 | 7.8         | 0.00090 | 3.0            | 0.1       | up         | glycosyl hydrolase, putative, expressed                                                             |
| LOC_Os07g02330 | 7.8         | 0.00158 | 3.0            | 0.2       | up         | protein phosphatase 2C, putative, expressed                                                         |
| LOC_Os06g05010 | 7.7         | 0.00128 | 2.9            | 0.1       | up         | early nodulin 93 ENOD93 protein, putative, expressed                                                |
| LOC_Os07g09630 | 7.6         | 0.00128 | 2.9            | 0.1       | up         | oxidoreductase, putative, expressed                                                                 |
| LOC_Os02g57280 | 7.6         | 0.00057 | 2.9            | 0.0       | up         | CBS domain containing membrane protein, putative, expressed                                         |
| LOC_Os10g23050 | 7.6         | 0.00079 | 2.9            | 0.1       | up         | helix-loop-helix DNA-binding protein, putative, expressed                                           |
| LOC_Os11g15040 | 7.5         | 0.00142 | 2.9            | 0.2       | up         | S-adenosyl-L-methionine:benzoic acid/salicylic acid carboxyl methyltransferase, putative, expressed |
| LOC_Os08g09690 | 7.5         | 0.00116 | 2.9            | 0.1       | up         | nuclear transcription factor Y subunit, putative, expressed                                         |
| LOC_Os05g39250 | 7.5         | 0.00278 | 2.9            | 0.3       | up         | phosphatidylethanolamine-binding protein, putative, expressed                                       |
| LOC_Os10g31850 | 7.5         | 0.00114 | 2.9            | 0.1       | up         | RING finger and CHY zinc finger domain-containing protein 1, putative, expressed                    |
| LOC_Os08g04740 | 7.4         | 0.00237 | 2.9            | 0.2       | up         | expressed protein                                                                                   |
| LOC_Os08g36920 | 7.3         | 0.00071 | 2.9            | 0.1       | up         | AP2 domain containing protein, expressed                                                            |
| LOC_Os03g18870 | 7.3         | 0.00190 | 2.9            | 0.2       | up         | heat shock protein DnaJ, putative, expressed                                                        |
| LOC_Os12g40330 | 7.3         | 0.00148 | 2.9            | 0.2       | up         | expressed protein                                                                                   |
| LOC_Os06g49640 | 7.2         | 0.00111 | 2.9            | 0.1       | up         | uncharacterized UPF0114 domain containing protein, expressed                                        |
| LOC_Os05g28210 | 7.2         | 0.00296 | 2.8            | 0.3       | up         | small hydrophilic plant seed protein, putative, expressed                                           |

|                |     |         |     |     |    |                                                                                                                     |
|----------------|-----|---------|-----|-----|----|---------------------------------------------------------------------------------------------------------------------|
| LOC_Os02g38386 | 7.1 | 0.00204 | 2.8 | 0.2 | up | NBS-LRR disease resistance protein, putative, expressed                                                             |
| LOC_Os02g06720 | 7.1 | 0.00240 | 2.8 | 0.2 | up | WD domain containing protein, putative, expressed                                                                   |
| LOC_Os03g12820 | 7.0 | 0.00057 | 2.8 | 0.0 | up | ATP8, putative, expressed                                                                                           |
| LOC_Os05g03910 | 7.0 | 0.00139 | 2.8 | 0.2 | up | RNA polymerase II-associated protein 3, putative, expressed                                                         |
| LOC_Os08g32930 | 7.0 | 0.00185 | 2.8 | 0.2 | up | expressed protein                                                                                                   |
| LOC_Os07g47630 | 6.9 | 0.00064 | 2.8 | 0.1 | up | RNA recognition motif containing protein, expressed                                                                 |
| LOC_Os10g28440 | 6.8 | 0.00227 | 2.8 | 0.2 | up | sulfate transporter 3.1, putative, expressed                                                                        |
| LOC_Os08g39150 | 6.8 | 0.00047 | 2.8 | 0.0 | up | expressed protein                                                                                                   |
| LOC_Os01g72370 | 6.7 | 0.00070 | 2.7 | 0.1 | up | helix-loop-helix DNA-binding domain containing protein, expressed                                                   |
| LOC_Os03g25770 | 6.7 | 0.00094 | 2.7 | 0.1 | up | RNA recognition motif containing protein, putative, expressed                                                       |
| LOC_Os02g09810 | 6.7 | 0.00065 | 2.7 | 0.1 | up | amino acid transporter, putative, expressed                                                                         |
| LOC_Os09g33800 | 6.7 | 0.00188 | 2.7 | 0.2 | up | arabinogalactan protein, putative, expressed                                                                        |
| LOC_Os03g63950 | 6.6 | 0.00065 | 2.7 | 0.1 | up | plastid-specific 30S ribosomal protein 1, chloroplast precursor, putative, expressed                                |
| LOC_Os07g16364 | 6.6 | 0.00262 | 2.7 | 0.2 | up | expressed protein                                                                                                   |
| LOC_Os09g04160 | 6.5 | 0.00468 | 2.7 | 0.4 | up | expressed protein                                                                                                   |
| LOC_Os03g26460 | 6.3 | 0.00108 | 2.7 | 0.1 | up | CS domain containing protein, putative, expressed                                                                   |
| LOC_Os02g53320 | 6.2 | 0.00062 | 2.6 | 0.1 | up | universal stress protein domain containing protein, putative, expressed                                             |
| LOC_Os01g58960 | 6.2 | 0.00055 | 2.6 | 0.0 | up | cytochrome P450, putative, expressed                                                                                |
| LOC_Os08g23754 | 6.2 | 0.00098 | 2.6 | 0.1 | up | expressed protein                                                                                                   |
| LOC_Os01g50400 | 6.2 | 0.00213 | 2.6 | 0.2 | up | STE_MEKK_ste11_MAP3K.5 - STE kinases include homologs to sterile 7, sterile 11 and sterile 20 from yeast, expressed |
| LOC_Os01g47840 | 6.2 | 0.00245 | 2.6 | 0.2 | up | S-locus-like receptor protein kinase, putative, expressed                                                           |
| LOC_Os06g48500 | 6.2 | 0.00139 | 2.6 | 0.1 | up | expressed protein                                                                                                   |
| LOC_Os12g05200 | 6.2 | 0.00088 | 2.6 | 0.1 | up | DNA binding protein, putative, expressed                                                                            |
| LOC_Os05g13300 | 6.1 | 0.00166 | 2.6 | 0.2 | up | helicase, putative, expressed                                                                                       |
| LOC_Os01g62970 | 6.1 | 0.00154 | 2.6 | 0.2 | up | expressed protein                                                                                                   |
| LOC_Os03g30300 | 6.0 | 0.00115 | 2.6 | 0.1 | up | 6-phosphogluconolactonase, putative, expressed                                                                      |
| LOC_Os05g37060 | 6.0 | 0.00167 | 2.6 | 0.2 | up | MYB family transcription factor, putative, expressed                                                                |
| LOC_Os01g38530 | 6.0 | 0.00071 | 2.6 | 0.1 | up | ELF3 protein, putative, expressed                                                                                   |
| LOC_Os03g47860 | 5.9 | 0.00197 | 2.6 | 0.2 | up | transferase family protein, putative, expressed                                                                     |
| LOC_Os06g15810 | 5.9 | 0.00070 | 2.6 | 0.1 | up | integral membrane protein, putative, expressed                                                                      |
| LOC_Os08g41400 | 5.8 | 0.00104 | 2.5 | 0.1 | up | expressed protein                                                                                                   |
| LOC_Os09g26840 | 5.8 | 0.00097 | 2.5 | 0.1 | up | expressed protein                                                                                                   |
| LOC_Os12g35610 | 5.8 | 0.00091 | 2.5 | 0.1 | up | respiratory burst oxidase, putative, expressed                                                                      |
| LOC_Os04g05010 | 5.8 | 0.00104 | 2.5 | 0.1 | up | CBS domain containing membrane protein, putative, expressed                                                         |
| LOC_Os12g24020 | 5.8 | 0.00029 | 2.5 | 0.0 | up | rhodanese-like domain containing protein, putative, expressed                                                       |
| LOC_Os05g27780 | 5.7 | 0.00412 | 2.5 | 0.3 | up | expressed protein                                                                                                   |
| LOC_Os06g04220 | 5.7 | 0.00071 | 2.5 | 0.1 | up | expressed protein                                                                                                   |
| LOC_Os04g09580 | 5.7 | 0.00440 | 2.5 | 0.3 | up | expressed protein                                                                                                   |
| LOC_Os01g12460 | 5.7 | 0.00173 | 2.5 | 0.2 | up | expressed protein                                                                                                   |
| LOC_Os03g19250 | 5.7 | 0.00310 | 2.5 | 0.3 | up | AMP-binding enzyme, putative, expressed                                                                             |
| LOC_Os09g35030 | 5.6 | 0.00097 | 2.5 | 0.1 | up | dehydration-responsive element-binding protein, putative, expressed                                                 |
| LOC_Os12g42860 | 5.6 | 0.00126 | 2.5 | 0.1 | up | 2-aminoethanethiol dioxygenase, putative, expressed                                                                 |
| LOC_Os02g44770 | 5.6 | 0.00103 | 2.5 | 0.1 | up | uncharacterized mscS family protein, putative, expressed                                                            |
| LOC_Os04g49370 | 5.6 | 0.00071 | 2.5 | 0.1 | up | expressed protein                                                                                                   |
| LOC_Os04g48350 | 5.6 | 0.00083 | 2.5 | 0.1 | up | dehydration-responsive element-binding protein, putative, expressed                                                 |
| LOC_Os01g63690 | 5.6 | 0.00352 | 2.5 | 0.3 | up | hs1, putative, expressed                                                                                            |
| LOC_Os05g33960 | 5.6 | 0.00088 | 2.5 | 0.1 | up | peptide transporter PTR2, putative, expressed                                                                       |
| LOC_Os07g46700 | 5.5 | 0.00073 | 2.5 | 0.1 | up | zinc finger, RING-type, putative, expressed                                                                         |
| LOC_Os09g23595 | 5.5 | 0.00060 | 2.5 | 0.0 | up | expressed protein                                                                                                   |
| LOC_Os09g11480 | 5.5 | 0.00098 | 2.5 | 0.1 | up | AP2 domain containing protein, expressed                                                                            |
| LOC_Os07g41310 | 5.5 | 0.00069 | 2.5 | 0.1 | up | COBRA, putative, expressed                                                                                          |
| LOC_Os01g47190 | 5.5 | 0.00185 | 2.5 | 0.2 | up | phosphoglycerate mutase, putative, expressed                                                                        |
| LOC_Os02g44990 | 5.4 | 0.00096 | 2.4 | 0.1 | up | OsFBDUF13 - F-box and DUF domain containing protein, expressed                                                      |
| LOC_Os05g29810 | 5.4 | 0.00216 | 2.4 | 0.2 | up | AP2 domain containing protein, expressed                                                                            |
| LOC_Os02g43020 | 5.4 | 0.00092 | 2.4 | 0.1 | up | heat shock protein ST1, putative, expressed                                                                         |
| LOC_Os01g69840 | 5.4 | 0.00103 | 2.4 | 0.1 | up | expressed protein                                                                                                   |
| LOC_Os09g39090 | 5.4 | 0.00278 | 2.4 | 0.2 | up | vignain precursor, putative, expressed                                                                              |
| LOC_Os05g34510 | 5.4 | 0.00136 | 2.4 | 0.1 | up | expressed protein                                                                                                   |
| LOC_Os01g56740 | 5.3 | 0.00242 | 2.4 | 0.2 | up | OsFBDUF7 - F-box and DUF domain containing protein, expressed                                                       |
| LOC_Os03g16960 | 5.3 | 0.00148 | 2.4 | 0.1 | up | cysteine-rich repeat secretory protein 55 precursor, putative, expressed                                            |
| LOC_Os06g48500 | 5.2 | 0.00356 | 2.4 | 0.3 | up | expressed protein                                                                                                   |
| LOC_Os01g06740 | 5.2 | 0.00163 | 2.4 | 0.2 | up | ribosome inactivating protein, putative, expressed                                                                  |
| LOC_Os05g34530 | 5.2 | 0.00258 | 2.4 | 0.2 | up | auxin-inducible protein, putative, expressed                                                                        |
| LOC_Os01g64120 | 5.2 | 0.00057 | 2.4 | 0.0 | up | 2Fe-2S iron-sulfur cluster binding domain containing protein, expressed                                             |
| LOC_Os02g32590 | 5.1 | 0.00145 | 2.4 | 0.1 | up | HSF-type DNA-binding domain containing protein, expressed                                                           |
| LOC_Os01g66544 | 5.1 | 0.00069 | 2.4 | 0.1 | up | expressed protein                                                                                                   |
| LOC_Os05g07940 | 5.1 | 0.00395 | 2.3 | 0.3 | up | glyoxalase family protein, putative, expressed                                                                      |
| LOC_Os04g31760 | 5.1 | 0.00230 | 2.3 | 0.2 | up | expressed protein                                                                                                   |
| LOC_Os01g10640 | 5.0 | 0.00185 | 2.3 | 0.2 | up | expressed protein                                                                                                   |
| LOC_Os03g20870 | 5.0 | 0.00251 | 2.3 | 0.2 | up | zinc finger, C3HC4 type domain containing protein, expressed                                                        |
| LOC_Os05g11140 | 5.0 | 0.00065 | 2.3 | 0.1 | up | CK1_CaseinKinase_1a.5 - CK1 includes the casein kinase 1 kinases, expressed                                         |
| LOC_Os02g33070 | 4.9 | 0.00176 | 2.3 | 0.2 | up | expressed protein                                                                                                   |
| LOC_Os10g26150 | 4.9 | 0.00288 | 2.3 | 0.2 | up | expressed protein                                                                                                   |
| LOC_Os05g38040 | 4.9 | 0.00067 | 2.3 | 0.1 | up | expressed protein                                                                                                   |
| LOC_Os08g17680 | 4.9 | 0.00102 | 2.3 | 0.1 | up | stromal cell-derived factor 2-like protein precursor, putative, expressed                                           |
| LOC_Os03g17200 | 4.9 | 0.00102 | 2.3 | 0.1 | up | plant-specific domain TIGR01589 family protein, expressed                                                           |
| LOC_Os06g12530 | 4.8 | 0.00184 | 2.3 | 0.2 | up | CS domain containing protein, putative, expressed                                                                   |
| LOC_Os03g50870 | 4.8 | 0.00069 | 2.3 | 0.1 | up | expressed protein                                                                                                   |
| LOC_Os03g04080 | 4.8 | 0.00535 | 2.3 | 0.3 | up | expressed protein                                                                                                   |
| LOC_Os09g26500 | 4.8 | 0.00244 | 2.3 | 0.2 | up | CXE carboxylesterase, putative, expressed                                                                           |
| LOC_Os03g19290 | 4.8 | 0.00274 | 2.3 | 0.2 | up | mitochondrial import inner membrane translocase subunit Tim17, putative, expressed                                  |
| LOC_Os05g38710 | 4.8 | 0.00207 | 2.3 | 0.2 | up | lipin, N-terminal conserved region family protein, expressed                                                        |
| LOC_Os03g07180 | 4.8 | 0.00162 | 2.2 | 0.1 | up | embryonic protein DC-8, putative, expressed                                                                         |
| LOC_Os03g46052 | 4.7 | 0.00740 | 2.2 | 0.4 | up | expressed protein                                                                                                   |
| LOC_Os12g08550 | 4.7 | 0.00326 | 2.2 | 0.2 | up | expressed protein                                                                                                   |
| LOC_Os03g57340 | 4.7 | 0.00120 | 2.2 | 0.1 | up | chaperone protein dnaJ, putative, expressed                                                                         |
| LOC_Os10g13700 | 4.7 | 0.00110 | 2.2 | 0.1 | up | phosphoenolpyruvate carboxykinase, putative, expressed                                                              |
| LOC_Os01g64360 | 4.7 | 0.00114 | 2.2 | 0.1 | up | MYB family transcription factor, putative, expressed                                                                |
| LOC_Os08g36150 | 4.7 | 0.00079 | 2.2 | 0.1 | up | activator of 90 kDa heat shock protein ATPase homolog, putative, expressed                                          |
| LOC_Os05g48200 | 4.7 | 0.00159 | 2.2 | 0.1 | up | glutamate synthase, chloroplast precursor, putative, expressed                                                      |
| LOC_Os06g39260 | 4.6 | 0.00060 | 2.2 | 0.0 | up | solute carrier family 35 member B1, putative, expressed                                                             |
| LOC_Os07g43160 | 4.6 | 0.00135 | 2.2 | 0.1 | up | uncharacterized glycosyl hydrolase Rv2006/MT2062, putative, expressed                                               |
| LOC_Os07g43950 | 4.5 | 0.00079 | 2.2 | 0.1 | up | RNA recognition motif containing protein, putative, expressed                                                       |
| LOC_Os02g28980 | 4.5 | 0.00071 | 2.2 | 0.1 | up | peptidyl-prolyl isomerase, putative, expressed                                                                      |
| LOC_Os05g41220 | 4.5 | 0.00057 | 2.2 | 0.0 | up | SNF1-related protein kinase regulatory subunit beta-1, putative, expressed                                          |
| LOC_Os07g39860 | 4.5 | 0.00074 | 2.2 | 0.1 | up | expressed protein                                                                                                   |
| LOC_Os03g60080 | 4.5 | 0.00422 | 2.2 | 0.3 | up | NAC domain-containing protein 67, putative, expressed                                                               |
| LOC_Os09g27830 | 4.5 | 0.00110 | 2.2 | 0.1 | up | OsPDIL2-3 protein disulfide isomerase PDIL2-3, expressed                                                            |
| LOC_Os01g13760 | 4.5 | 0.00231 | 2.2 | 0.2 | up | dnaJ domain containing protein, expressed                                                                           |
| LOC_Os01g37470 | 4.4 | 0.00070 | 2.2 | 0.1 | up | asp/Glu racemase, putative, expressed                                                                               |
| LOC_Os01g53730 | 4.4 | 0.00153 | 2.2 | 0.1 | up | expressed protein                                                                                                   |
| LOC_Os02g38392 | 4.4 | 0.00214 | 2.1 | 0.2 | up | NBS-LRR disease resistance protein, putative, expressed                                                             |
| LOC_Os01g32780 | 4.4 | 0.00060 | 2.1 | 0.0 | up | universal stress protein domain containing protein, putative, expressed                                             |
| LOC_Os05g38264 | 4.4 | 0.00057 | 2.1 | 0.0 | up | expressed protein                                                                                                   |
| LOC_Os03g51010 | 4.4 | 0.00137 | 2.1 | 0.1 | up | hydrolase, alpha/beta fold family domain containing protein, expressed                                              |

|                |     |         |     |     |    |                                                                                                      |
|----------------|-----|---------|-----|-----|----|------------------------------------------------------------------------------------------------------|
| LOC_Os02g34580 | 4.3 | 0.00434 | 2.1 | 0.3 | up | ammonium transporter protein, putative, expressed                                                    |
| LOC_Os03g26870 | 4.3 | 0.00259 | 2.1 | 0.2 | up | WD-40 repeat family protein, putative, expressed                                                     |
| LOC_Os09g23350 | 4.3 | 0.00408 | 2.1 | 0.3 | up | trehalose synthase, putative, expressed                                                              |
| LOC_Os10g37640 | 4.3 | 0.00225 | 2.1 | 0.2 | up | HIT zinc finger domain containing protein, expressed                                                 |
| LOC_Os05g38710 | 4.3 | 0.00126 | 2.1 | 0.1 | up | lipin, N-terminal conserved region family protein, expressed                                         |
| LOC_Os07g44950 | 4.2 | 0.00086 | 2.1 | 0.1 | up | bZIP transcription factor domain containing protein, expressed                                       |
| LOC_Os12g31860 | 4.2 | 0.00170 | 2.1 | 0.1 | up | ureide permease, putative, expressed                                                                 |
| LOC_Os06g21330 | 4.2 | 0.00093 | 2.1 | 0.1 | up | ABB1 - Ankyrin repeat region with 2 Bric-a-Brac, Tramtrack, Broad Complex BTB domains, expressed     |
| LOC_Os01g56470 | 4.2 | 0.00083 | 2.1 | 0.1 | up | mal d 1-associated protein, putative, expressed                                                      |
| LOC_Os03g03980 | 4.2 | 0.00185 | 2.1 | 0.1 | up | coiled-coil domain-containing protein 124, putative, expressed                                       |
| LOC_Os07g34570 | 4.2 | 0.00095 | 2.1 | 0.1 | up | FAD dependent oxidoreductase domain containing protein, expressed                                    |
| LOC_Os09g31482 | 4.2 | 0.00113 | 2.1 | 0.1 | up | splicing factor U2AF, putative, expressed                                                            |
| LOC_Os01g08560 | 4.2 | 0.00077 | 2.1 | 0.1 | up | DnaK family protein, putative, expressed                                                             |
| LOC_Os06g50230 | 4.2 | 0.00359 | 2.1 | 0.2 | up | expressed protein                                                                                    |
| LOC_Os06g04390 | 4.2 | 0.00247 | 2.1 | 0.2 | up | expressed protein                                                                                    |
| LOC_Os03g31300 | 4.2 | 0.00101 | 2.1 | 0.1 | up | chaperone protein clpB 1, putative, expressed                                                        |
| LOC_Os07g35330 | 4.2 | 0.00200 | 2.1 | 0.2 | up | TKL_IRAK_DUF26-1c.13 - DUF26 kinases have homology to DUF26 containing loci, expressed               |
| LOC_Os08g37660 | 4.1 | 0.00138 | 2.1 | 0.1 | up | plastocyanin-like domain containing protein, putative, expressed                                     |
| LOC_Os01g43540 | 4.1 | 0.00160 | 2.1 | 0.1 | up | suppressor of G2 allele of SKP1, putative, expressed                                                 |
| LOC_Os04g57760 | 4.1 | 0.00071 | 2.0 | 0.1 | up | expressed protein                                                                                    |
| LOC_Os12g09540 | 4.1 | 0.00145 | 2.0 | 0.1 | up | phosphoribosylamine-glycine ligase, putative, expressed                                              |
| LOC_Os09g29840 | 4.1 | 0.00079 | 2.0 | 0.1 | up | heat shock protein, putative, expressed                                                              |
| LOC_Os03g45250 | 4.1 | 0.00201 | 2.0 | 0.2 | up | 2-aminoethanethiol dioxygenase, putative, expressed                                                  |
| LOC_Os04g34150 | 4.1 | 0.00157 | 2.0 | 0.1 | up | expressed protein                                                                                    |
| LOC_Os08g37456 | 4.1 | 0.00459 | 2.0 | 0.3 | up | flavonol synthase/flavanone 3-hydroxylase, putative, expressed                                       |
| LOC_Os08g02460 | 4.1 | 0.00062 | 2.0 | 0.0 | up | expressed protein                                                                                    |
| LOC_Os02g54820 | 4.1 | 0.00439 | 2.0 | 0.3 | up | trehalose-6-phosphate synthase, putative, expressed                                                  |
| LOC_Os03g59180 | 4.0 | 0.00067 | 2.0 | 0.0 | up | expressed protein                                                                                    |
| LOC_Os04g41260 | 4.0 | 0.00253 | 2.0 | 0.2 | up | amine oxidase, flavin-containing, domain containing protein, expressed                               |
| LOC_Os01g70570 | 4.0 | 0.00161 | 2.0 | 0.1 | up | acyltransferase, putative, expressed                                                                 |
| LOC_Os09g31478 | 4.0 | 0.00237 | 2.0 | 0.2 | up | auxin efflux carrier component, putative, expressed                                                  |
| LOC_Os08g15460 | 4.0 | 0.00326 | 2.0 | 0.2 | up | preprotein translocase subunit secY, putative, expressed                                             |
| LOC_Os03g55320 | 4.0 | 0.00135 | 2.0 | 0.1 | up | protein phosphatase 2C, putative, expressed                                                          |
| LOC_Os01g41770 | 4.0 | 0.00677 | 2.0 | 0.3 | up | leucine rich repeat protein, putative, expressed                                                     |
| LOC_Os11g18830 | 4.0 | 0.00065 | 2.0 | 0.0 | up | survival motor neuron containing protein, expressed                                                  |
| LOC_Os02g45450 | 3.9 | 0.00473 | 2.0 | 0.3 | up | dehydration-responsive element-binding protein, putative, expressed                                  |
| LOC_Os03g22050 | 3.9 | 0.00121 | 2.0 | 0.1 | up | CAMK_KIN1/SNF1/Nim1_1like.16 - CAMK includes calcium/calmodulin dependent protein kinases, expressed |
| LOC_Os06g13580 | 3.9 | 0.00290 | 2.0 | 0.2 | up | expressed protein                                                                                    |
| LOC_Os01g34080 | 3.9 | 0.00060 | 2.0 | 0.0 | up | armadillo/beta-catenin-like repeat family protein, expressed                                         |
| LOC_Os03g55290 | 3.9 | 0.00538 | 2.0 | 0.3 | up | GASR3 - Gibberellin-regulated GASA/GAST/Snakin family protein precursor, expressed                   |
| LOC_Os03g41060 | 3.9 | 0.00065 | 2.0 | 0.0 | up | GASR2 - Gibberellin-regulated GASA/GAST/Snakin family protein precursor, putative, expressed         |
| LOC_Os02g01540 | 3.9 | 0.00142 | 2.0 | 0.1 | up | ribosomal protein, putative, expressed                                                               |
| LOC_Os05g14370 | 3.9 | 0.00467 | 1.9 | 0.3 | up | WRKY82, expressed                                                                                    |
| LOC_Os01g65920 | 3.8 | 0.00391 | 1.9 | 0.2 | up | F-box/LRR-repeat protein 2, putative, expressed                                                      |
| LOC_Os02g52010 | 3.8 | 0.00272 | 1.9 | 0.2 | up | phosphate-induced protein 1 conserved region domain containing protein, expressed                    |
| LOC_Os12g40180 | 3.8 | 0.00213 | 1.9 | 0.2 | up | expressed protein                                                                                    |
| LOC_Os01g59180 | 3.8 | 0.00219 | 1.9 | 0.2 | up | OsFBX27 - F-box domain containing protein, expressed                                                 |
| LOC_Os03g50130 | 3.8 | 0.00265 | 1.9 | 0.2 | up | microsomal glutathione S-transferase 3, putative, expressed                                          |
| LOC_Os09g26880 | 3.8 | 0.00177 | 1.9 | 0.1 | up | aldehyde dehydrogenase, putative, expressed                                                          |
| LOC_Os01g06876 | 3.8 | 0.00410 | 1.9 | 0.2 | up | Cf-2, putative, expressed                                                                            |
| LOC_Os01g48250 | 3.8 | 0.00216 | 1.9 | 0.2 | up | OsFBDUF5 - F-box and DUF domain containing protein, expressed                                        |
| LOC_Os10g28350 | 3.8 | 0.00115 | 1.9 | 0.1 | up | 1,2-dihydroxy-3-keto-5-methylthiopentene dioxygenase protein, putative, expressed                    |
| LOC_Os04g38320 | 3.8 | 0.00117 | 1.9 | 0.1 | up | expressed protein                                                                                    |
| LOC_Os07g30300 | 3.8 | 0.00057 | 1.9 | 0.0 | up | small G protein family protein, putative, expressed                                                  |
| LOC_Os05g30140 | 3.8 | 0.00128 | 1.9 | 0.1 | up | RNA recognition motif containing protein, expressed                                                  |
| LOC_Os06g28194 | 3.8 | 0.00353 | 1.9 | 0.2 | up | expressed protein                                                                                    |
| LOC_Os04g40990 | 3.8 | 0.00290 | 1.9 | 0.2 | up | malate synthase, glyoxysomal, putative, expressed                                                    |
| LOC_Os09g31180 | 3.8 | 0.00186 | 1.9 | 0.1 | up | ribosomal protein L6, putative, expressed                                                            |
| LOC_Os01g01340 | 3.8 | 0.00163 | 1.9 | 0.1 | up | light-induced protein 1-like, putative, expressed                                                    |
| LOC_Os01g60600 | 3.8 | 0.00969 | 1.9 | 0.4 | up | WRKY108, expressed                                                                                   |
| LOC_Os05g49164 | 3.8 | 0.00383 | 1.9 | 0.2 | up | expressed protein                                                                                    |
| LOC_Os04g29680 | 3.8 | 0.00172 | 1.9 | 0.1 | up | OsWAK38 - OsWAK receptor-like protein kinase, expressed                                              |
| LOC_Os04g27190 | 3.7 | 0.00128 | 1.9 | 0.1 | up | terpene synthase, putative, expressed                                                                |
| LOC_Os06g02620 | 3.7 | 0.00065 | 1.9 | 0.0 | up | chaperone protein dnaJ, putative, expressed                                                          |
| LOC_Os06g50300 | 3.7 | 0.00173 | 1.9 | 0.1 | up | heat shock protein, putative, expressed                                                              |
| LOC_Os02g43360 | 3.7 | 0.00188 | 1.9 | 0.1 | up | cytochrome b5-like Heme/Steroid binding domain containing protein, expressed                         |
| LOC_Os06g41770 | 3.7 | 0.00047 | 1.9 | 0.0 | up | bZIP transcription factor domain containing protein, expressed                                       |
| LOC_Os11g02080 | 3.7 | 0.00071 | 1.9 | 0.1 | up | expressed protein                                                                                    |
| LOC_Os05g07940 | 3.7 | 0.00348 | 1.9 | 0.2 | up | glyoxalase family protein, putative, expressed                                                       |
| LOC_Os09g27330 | 3.7 | 0.00247 | 1.9 | 0.2 | up | oxidoreductase/transition metal ion binding protein, putative, expressed                             |
| LOC_Os03g05750 | 3.7 | 0.01425 | 1.9 | 0.5 | up | heavy-metal-associated domain-containing protein, putative, expressed                                |
| LOC_Os01g15000 | 3.7 | 0.00333 | 1.9 | 0.2 | up | lipase, putative, expressed                                                                          |
| LOC_Os06g50300 | 3.7 | 0.00743 | 1.9 | 0.3 | up | heat shock protein, putative, expressed                                                              |
| LOC_Os07g37400 | 3.7 | 0.00114 | 1.9 | 0.1 | up | OsFBX257 - F-box domain containing protein, expressed                                                |
| LOC_Os07g41280 | 3.7 | 0.00154 | 1.9 | 0.1 | up | 6-phosphogluconolactonase, putative, expressed                                                       |
| LOC_Os06g48200 | 3.7 | 0.00554 | 1.9 | 0.3 | up | glycosyl hydrolases family 16, putative, expressed                                                   |
| LOC_Os11g14544 | 3.7 | 0.00547 | 1.9 | 0.3 | up | expressed protein                                                                                    |
| LOC_Os07g03260 | 3.7 | 0.00108 | 1.9 | 0.1 | up | CSLC10 - cellulose synthase-like family C, expressed                                                 |
| LOC_Os07g08840 | 3.7 | 0.00130 | 1.9 | 0.1 | up | thioredoxin, putative, expressed                                                                     |
| LOC_Os02g02410 | 3.7 | 0.00553 | 1.9 | 0.3 | up | DnaK family protein, putative, expressed                                                             |
| LOC_Os10g35460 | 3.7 | 0.00276 | 1.9 | 0.2 | up | COBRA, putative, expressed                                                                           |
| LOC_Os03g51610 | 3.7 | 0.00170 | 1.9 | 0.1 | up | Inositol 1, 3, 4-trisphosphate 5/6-kinase, putative, expressed                                       |
| LOC_Os02g44090 | 3.7 | 0.00694 | 1.9 | 0.3 | up | zinc finger protein, putative, expressed                                                             |
| LOC_Os07g40240 | 3.6 | 0.00064 | 1.9 | 0.0 | up | GASR9 - Gibberellin-regulated GASA/GAST/Snakin family protein precursor, expressed                   |
| LOC_Os01g38530 | 3.6 | 0.00122 | 1.9 | 0.1 | up | ELF3 protein, putative, expressed                                                                    |
| LOC_Os01g64730 | 3.6 | 0.00064 | 1.9 | 0.0 | up | bZIP transcription factor domain containing protein, expressed                                       |
| LOC_Os01g61990 | 3.6 | 0.00071 | 1.9 | 0.1 | up | ankyrin repeat-containing protein, putative, expressed                                               |
| LOC_Os06g09820 | 3.6 | 0.00311 | 1.9 | 0.2 | up | cupin superfamily protein, putative, expressed                                                       |
| LOC_Os03g38745 | 3.6 | 0.00047 | 1.9 | 0.0 | up | serine/arginine repetitive matrix protein 1, putative, expressed                                     |
| LOC_Os07g38230 | 3.6 | 0.00077 | 1.9 | 0.1 | up | expressed protein                                                                                    |
| LOC_Os02g11790 | 3.6 | 0.00091 | 1.9 | 0.1 | up | OsFBK4 - F-box domain and kelch repeat containing protein, expressed                                 |
| LOC_Os02g12380 | 3.6 | 0.00095 | 1.9 | 0.1 | up | histone deacetylase, putative, expressed                                                             |
| LOC_Os09g27670 | 3.6 | 0.00121 | 1.9 | 0.1 | up | expressed protein                                                                                    |
| LOC_Os03g04020 | 3.6 | 0.00263 | 1.9 | 0.2 | up | expansin precursor, putative, expressed                                                              |
| LOC_Os07g05365 | 3.6 | 0.00093 | 1.9 | 0.1 | up | photosystem II 10 kDa polypeptide, chloroplast precursor, putative, expressed                        |
| LOC_Os02g52210 | 3.6 | 0.00377 | 1.9 | 0.2 | up | zinc finger, C3HC4 type domain containing protein, expressed                                         |
| LOC_Os01g08700 | 3.6 | 0.00230 | 1.8 | 0.2 | up | GIGANTEA, putative, expressed                                                                        |
| LOC_Os02g37250 | 3.6 | 0.00079 | 1.8 | 0.1 | up | hypothetical protein                                                                                 |
| LOC_Os09g27680 | 3.5 | 0.00079 | 1.8 | 0.1 | up | expressed protein                                                                                    |
| LOC_Os04g45270 | 3.5 | 0.00185 | 1.8 | 0.1 | up | aspartyl protease family protein, putative, expressed                                                |
| LOC_Os02g39884 | 3.5 | 0.00197 | 1.8 | 0.1 | up | expressed protein                                                                                    |
| LOC_Os03g59225 | 3.5 | 0.00164 | 1.8 | 0.1 | up | expressed protein                                                                                    |
| LOC_Os10g30410 | 3.5 | 0.00562 | 1.8 | 0.3 | up | cytochrome P450 71D7, putative, expressed                                                            |
| LOC_Os10g42190 | 3.5 | 0.00204 | 1.8 | 0.1 | up | leucine rich repeat containing protein, expressed                                                    |
| LOC_Os06g49020 | 3.5 | 0.00944 | 1.8 | 0.4 | up | 26S proteasome non-ATPase regulatory subunit 14, putative, expressed                                 |

|                |     |         |     |     |    |                                                                                   |
|----------------|-----|---------|-----|-----|----|-----------------------------------------------------------------------------------|
| LOC_Os10g39640 | 3.5 | 0.00384 | 1.8 | 0.2 | up | expansin precursor, putative, expressed                                           |
| LOC_Os02g56900 | 3.5 | 0.00098 | 1.8 | 0.1 | up | thioredoxin family protein, putative, expressed                                   |
| LOC_Os01g52900 | 3.5 | 0.00357 | 1.8 | 0.2 | up | expressed protein                                                                 |
| LOC_Os01g46600 | 3.5 | 0.00199 | 1.8 | 0.1 | up | seed maturation protein PM41, putative, expressed                                 |
| LOC_Os06g22620 | 3.5 | 0.00225 | 1.8 | 0.1 | up | hypothetical protein                                                              |
| LOC_Os03g56160 | 3.5 | 0.00348 | 1.8 | 0.2 | up | lectin-like receptor kinase 7, putative, expressed                                |
| LOC_Os09g28500 | 3.5 | 0.00575 | 1.8 | 0.3 | up | EF hand family protein, putative, expressed                                       |
| LOC_Os07g49114 | 3.4 | 0.00875 | 1.8 | 0.3 | up | wound-induced protein W112, putative, expressed                                   |
| LOC_Os04g34530 | 3.4 | 0.00202 | 1.8 | 0.1 | up | integral membrane protein DUF6 containing protein, expressed                      |
| LOC_Os01g64430 | 3.4 | 0.00408 | 1.8 | 0.2 | up | DUF623 domain containing protein, expressed                                       |
| LOC_Os03g25400 | 3.4 | 0.00057 | 1.8 | 0.0 | up | kinase, putative, expressed                                                       |
| LOC_Os02g04860 | 3.4 | 0.00173 | 1.8 | 0.1 | up | expressed protein                                                                 |
| LOC_Os09g25934 | 3.4 | 0.00101 | 1.8 | 0.1 | up | expressed protein                                                                 |
| LOC_Os05g51420 | 3.4 | 0.00173 | 1.8 | 0.1 | up | hypersensitive-induced response protein, putative, expressed                      |
| LOC_Os02g55610 | 3.4 | 0.00548 | 1.8 | 0.3 | up | serine-rich protein, putative, expressed                                          |
| LOC_Os04g38400 | 3.4 | 0.00359 | 1.8 | 0.2 | up | ethylene-insensitive 3, putative, expressed                                       |
| LOC_Os06g03570 | 3.4 | 0.00093 | 1.8 | 0.1 | up | pentatricopeptide, putative, expressed                                            |
| LOC_Os05g08860 | 3.4 | 0.00292 | 1.8 | 0.2 | up | expressed protein                                                                 |
| LOC_Os12g32986 | 3.4 | 0.00301 | 1.8 | 0.2 | up | heat shock protein, putative, expressed                                           |
| LOC_Os05g35970 | 3.4 | 0.00110 | 1.8 | 0.1 | up | expressed protein                                                                 |
| LOC_Os06g05440 | 3.4 | 0.00200 | 1.8 | 0.1 | up | expressed protein                                                                 |
| LOC_Os09g25070 | 3.4 | 0.00207 | 1.8 | 0.1 | up | WRKY62, expressed                                                                 |
| LOC_Os03g06390 | 3.4 | 0.00194 | 1.8 | 0.1 | up | expressed protein                                                                 |
| LOC_Os02g53500 | 3.4 | 0.00250 | 1.8 | 0.2 | up | RFC5 - Putative clamp loader of PCNA, replication factor C subunit 5, expressed   |
| LOC_Os01g22900 | 3.4 | 0.00297 | 1.8 | 0.2 | up | neutral/alkaline invertase, putative, expressed                                   |
| LOC_Os08g38020 | 3.4 | 0.00124 | 1.7 | 0.1 | up | bZIP transcription factor domain containing protein, expressed                    |
| LOC_Os07g49140 | 3.4 | 0.00072 | 1.7 | 0.0 | up | expressed protein                                                                 |
| LOC_Os08g34320 | 3.4 | 0.00574 | 1.7 | 0.3 | up | expressed protein                                                                 |
| LOC_Os01g67420 | 3.4 | 0.00174 | 1.7 | 0.1 | up | lipase, putative, expressed                                                       |
| LOC_Os09g03810 | 3.4 | 0.00247 | 1.7 | 0.2 | up | expressed protein                                                                 |
| LOC_Os02g33380 | 3.3 | 0.00091 | 1.7 | 0.1 | up | pectinesterase inhibitor domain containing protein, putative, expressed           |
| LOC_Os01g12464 | 3.3 | 0.00117 | 1.7 | 0.1 | up | CHCH domain containing protein, expressed                                         |
| LOC_Os01g68300 | 3.3 | 0.00111 | 1.7 | 0.1 | up | expressed protein                                                                 |
| LOC_Os02g54130 | 3.3 | 0.00094 | 1.7 | 0.1 | up | heat shock protein DnaJ, putative, expressed                                      |
| LOC_Os03g49820 | 3.3 | 0.00704 | 1.7 | 0.3 | up | expressed protein                                                                 |
| LOC_Os02g10310 | 3.3 | 0.00154 | 1.7 | 0.1 | up | fumarylacetoacetase, putative, expressed                                          |
| LOC_Os01g71140 | 3.3 | 0.00169 | 1.7 | 0.1 | up | xylanase inhibitor, putative, expressed                                           |
| LOC_Os04g02530 | 3.3 | 0.00225 | 1.7 | 0.1 | up | expressed protein                                                                 |
| LOC_Os09g28390 | 3.3 | 0.00179 | 1.7 | 0.1 | up | cytochrome P450, putative, expressed                                              |
| LOC_Os01g16170 | 3.3 | 0.00473 | 1.7 | 0.2 | up | PO loop repeat domain containing protein, expressed                               |
| LOC_Os07g05360 | 3.3 | 0.00079 | 1.7 | 0.1 | up | photosystem II 10 kDa polypeptide, chloroplast precursor, putative, expressed     |
| LOC_Os02g52270 | 3.3 | 0.00067 | 1.7 | 0.0 | up | heat shock protein DnaJ, putative, expressed                                      |
| LOC_Os08g25690 | 3.3 | 0.00330 | 1.7 | 0.2 | up | expressed protein                                                                 |
| LOC_Os12g40780 | 3.3 | 0.00238 | 1.7 | 0.1 | up | ankyrin repeat domain-containing protein 44, putative, expressed                  |
| LOC_Os11g34690 | 3.3 | 0.00130 | 1.7 | 0.1 | up | expressed protein                                                                 |
| LOC_Os10g32550 | 3.3 | 0.00288 | 1.7 | 0.2 | up | T-complex protein, putative, expressed                                            |
| LOC_Os12g14540 | 3.3 | 0.00185 | 1.7 | 0.1 | up | expressed protein                                                                 |
| LOC_Os03g52340 | 3.3 | 0.00102 | 1.7 | 0.1 | up | endoplasmic oxidoreductin-1 precursor, putative, expressed                        |
| LOC_Os08g26870 | 3.3 | 0.00057 | 1.7 | 0.0 | up | wound responsive protein, putative, expressed                                     |
| LOC_Os11g14140 | 3.3 | 0.00586 | 1.7 | 0.3 | up | OsFBK25 - F-box domain and kelch repeat containing protein, expressed             |
| LOC_Os10g35070 | 3.3 | 0.00200 | 1.7 | 0.1 | up | alpha-galactosidase precursor, putative, expressed                                |
| LOC_Os02g12360 | 3.3 | 0.00130 | 1.7 | 0.1 | up | nuclear protein ZAP-related, putative, expressed                                  |
| LOC_Os06g51260 | 3.3 | 0.00091 | 1.7 | 0.1 | up | MYB family transcription factor, putative, expressed                              |
| LOC_Os01g68770 | 3.3 | 0.00421 | 1.7 | 0.2 | up | selenium-binding protein, putative, expressed                                     |
| LOC_Os04g53830 | 3.3 | 0.00230 | 1.7 | 0.1 | up | 3-beta hydroxysteroid dehydrogenase/isomerase family protein, putative, expressed |
| LOC_Os01g09030 | 3.3 | 0.00162 | 1.7 | 0.1 | up | 2-aminoethanethiol dioxygenase, putative, expressed                               |
| LOC_Os06g16060 | 3.3 | 0.00202 | 1.7 | 0.1 | up | zinc finger, C3HC4 type domain containing protein, expressed                      |
| LOC_Os03g21210 | 3.3 | 0.00180 | 1.7 | 0.1 | up | endoglucanase, putative, expressed                                                |
| LOC_Os05g06440 | 3.2 | 0.00277 | 1.7 | 0.2 | up | dnaJ homolog subfamily B member 11 precursor, putative, expressed                 |
| LOC_Os04g44820 | 3.2 | 0.00169 | 1.7 | 0.1 | up | zinc finger, C3HC4 type domain containing protein, expressed                      |
| LOC_Os11g44940 | 3.2 | 0.00164 | 1.7 | 0.1 | up | seed maturation protein PM27, putative, expressed                                 |
| LOC_Os01g29330 | 3.2 | 0.00388 | 1.7 | 0.2 | up | expressed protein                                                                 |
| LOC_Os03g47500 | 3.2 | 0.00083 | 1.7 | 0.1 | up | zinc finger, C3HC4 type domain containing protein, expressed                      |
| LOC_Os06g11660 | 3.2 | 0.00680 | 1.7 | 0.3 | up | phosphate-induced protein 1 conserved region domain containing protein, expressed |
| LOC_Os11g40249 | 3.2 | 0.00067 | 1.7 | 0.0 | up | expressed protein                                                                 |
| LOC_Os11g37230 | 3.2 | 0.00077 | 1.7 | 0.0 | up | zinc finger, C3HC4 type domain containing protein, expressed                      |
| LOC_Os07g49470 | 3.2 | 0.00529 | 1.7 | 0.2 | up | protein kinase APK1B, chloroplast precursor, putative, expressed                  |
| LOC_Os03g03034 | 3.2 | 0.00333 | 1.7 | 0.2 | up | flavonol synthase/flavanone 3-hydroxylase, putative, expressed                    |
| LOC_Os06g49030 | 3.2 | 0.00128 | 1.7 | 0.1 | up | activator of 90 kDa heat shock protein ATPase homolog, putative, expressed        |
| LOC_Os03g15720 | 3.2 | 0.00172 | 1.7 | 0.1 | up | expressed protein                                                                 |
| LOC_Os01g15270 | 3.2 | 0.00057 | 1.7 | 0.0 | up | expressed protein                                                                 |
| LOC_Os01g48940 | 3.2 | 0.00269 | 1.7 | 0.2 | up | expressed protein                                                                 |
| LOC_Os01g13570 | 3.2 | 0.00029 | 1.7 | 0.0 | up | phosphoglycerate mutase, putative, expressed                                      |
| LOC_Os01g16140 | 3.2 | 0.00107 | 1.7 | 0.1 | up | expressed protein                                                                 |
| LOC_Os06g48160 | 3.2 | 0.00365 | 1.7 | 0.2 | up | glycosyl hydrolases family 16, putative, expressed                                |
| LOC_Os02g13370 | 3.2 | 0.00295 | 1.7 | 0.2 | up | expressed protein                                                                 |
| LOC_Os12g11840 | 3.2 | 0.00353 | 1.7 | 0.2 | up | hypothetical protein                                                              |
| LOC_Os08g38880 | 3.2 | 0.00292 | 1.7 | 0.2 | up | WD-40 repeat family protein, putative, expressed                                  |
| LOC_Os09g13470 | 3.1 | 0.00753 | 1.7 | 0.3 | up | plant protein of unknown function domain containing protein, expressed            |
| LOC_Os06g48160 | 3.1 | 0.00199 | 1.7 | 0.1 | up | glycosyl hydrolases family 16, putative, expressed                                |
| LOC_Os01g13560 | 3.1 | 0.00211 | 1.6 | 0.1 | up | membrane associated DUF588 domain containing protein, putative, expressed         |
| LOC_Os02g13360 | 3.1 | 0.00235 | 1.6 | 0.1 | up | expressed protein                                                                 |
| LOC_Os04g47640 | 3.1 | 0.00710 | 1.6 | 0.3 | up | RWP-RK domain-containing protein, putative, expressed                             |
| LOC_Os01g41240 | 3.1 | 0.00230 | 1.6 | 0.1 | up | hydrolase, alpha/beta fold family domain containing protein, expressed            |
| LOC_Os08g02520 | 3.1 | 0.00123 | 1.6 | 0.1 | up | OsSAUR31 - Auxin-responsive SAUR gene family member, expressed                    |
| LOC_Os05g51470 | 3.1 | 0.00060 | 1.6 | 0.0 | up | 2-aminoethanethiol dioxygenase, putative, expressed                               |
| LOC_Os02g51510 | 3.1 | 0.00755 | 1.6 | 0.3 | up | expressed protein                                                                 |
| LOC_Os08g44390 | 3.1 | 0.00387 | 1.6 | 0.2 | up | EF hand family protein, putative, expressed                                       |
| LOC_Os06g01200 | 3.1 | 0.00156 | 1.6 | 0.1 | up | zinc finger, C3HC4 type domain containing protein, expressed                      |
| LOC_Os01g64790 | 3.1 | 0.00130 | 1.6 | 0.1 | up | AP2 domain containing protein, expressed                                          |
| LOC_Os03g56250 | 3.1 | 0.00145 | 1.6 | 0.1 | up | LRR receptor-like protein kinase, putative, expressed                             |
| LOC_Os05g09550 | 3.1 | 0.00469 | 1.6 | 0.2 | up | Der1-like family domain containing protein, expressed                             |
| LOC_Os03g41330 | 3.1 | 0.00358 | 1.6 | 0.2 | up | DUF260 domain containing protein, putative, expressed                             |
| LOC_Os02g46460 | 3.1 | 0.00510 | 1.6 | 0.2 | up | peptide transporter PTR2, putative, expressed                                     |
| LOC_Os01g45659 | 3.1 | 0.00348 | 1.6 | 0.2 | up | expressed protein                                                                 |
| LOC_Os02g20540 | 3.1 | 0.00204 | 1.6 | 0.1 | up | fasciclin domain containing protein, expressed                                    |
| LOC_Os04g28410 | 3.1 | 0.00310 | 1.6 | 0.2 | up | expressed protein                                                                 |
| LOC_Os10g42610 | 3.0 | 0.00480 | 1.6 | 0.2 | up | expressed protein                                                                 |
| LOC_Os03g61960 | 3.0 | 0.00071 | 1.6 | 0.0 | up | 2Fe-2S iron-sulfur cluster binding domain containing protein, expressed           |
| LOC_Os07g31540 | 3.0 | 0.00482 | 1.6 | 0.2 | up | ubiquitin family protein, putative, expressed                                     |
| LOC_Os08g29530 | 3.0 | 0.00064 | 1.6 | 0.0 | up | double-stranded RNA binding motif containing protein, expressed                   |
| LOC_Os01g65520 | 3.0 | 0.00243 | 1.6 | 0.1 | up | Sad1 / UNC-like C-terminal domain containing protein, putative, expressed         |
| LOC_Os05g06970 | 3.0 | 0.00353 | 1.6 | 0.2 | up | peroxidase precursor, putative, expressed                                         |
| LOC_Os09g39730 | 3.0 | 0.00158 | 1.6 | 0.1 | up | Core histone H2A/H2B/H3/H4 domain containing protein, putative, expressed         |
| LOC_Os03g51390 | 3.0 | 0.00383 | 1.6 | 0.2 | up | expressed protein                                                                 |

|                |     |         |     |     |    |                                                                                       |
|----------------|-----|---------|-----|-----|----|---------------------------------------------------------------------------------------|
| LOC_Os03g07880 | 3.0 | 0.00065 | 1.6 | 0.0 | up | nuclear transcription factor Y subunit, putative, expressed                           |
| LOC_Os06g38294 | 3.0 | 0.00439 | 1.6 | 0.2 | up | peptide transporter PTR2, putative, expressed                                         |
| LOC_Os05g48040 | 3.0 | 0.00029 | 1.6 | 0.0 | up | MATE efflux family protein, putative, expressed                                       |
| LOC_Os12g43840 | 3.0 | 0.00309 | 1.6 | 0.2 | up | ankyrin repeat domain-containing protein, putative, expressed                         |
| LOC_Os01g56180 | 3.0 | 0.00079 | 1.6 | 0.0 | up | expressed protein                                                                     |
| LOC_Os03g20090 | 3.0 | 0.00503 | 1.6 | 0.2 | up | MYB family transcription factor, putative, expressed                                  |
| LOC_Os02g56680 | 3.0 | 0.00138 | 1.6 | 0.1 | up | dehydrogenase, putative, expressed                                                    |
| LOC_Os11g34750 | 3.0 | 0.00514 | 1.6 | 0.2 | up | ABC1 family domain containing protein, putative, expressed                            |
| LOC_Os12g29400 | 3.0 | 0.00163 | 1.6 | 0.1 | up | GRAM domain containing protein, expressed                                             |
| LOC_Os03g22270 | 3.0 | 0.00195 | 1.6 | 0.1 | up | auxin-repressed protein, putative, expressed                                          |
| LOC_Os12g40470 | 3.0 | 0.00394 | 1.6 | 0.2 | up | DC1 domain-containing protein, putative, expressed                                    |
| LOC_Os07g29330 | 3.0 | 0.01446 | 1.6 | 0.4 | up | serine/threonine-protein kinase CTR1, putative, expressed                             |
| LOC_Os04g49260 | 3.0 | 0.00178 | 1.6 | 0.1 | up | heavy metal-associated domain containing protein, expressed                           |
| LOC_Os11g44810 | 3.0 | 0.00322 | 1.6 | 0.2 | up | auxin-repressed protein, putative, expressed                                          |
| LOC_Os07g47510 | 3.0 | 0.00863 | 1.6 | 0.3 | up | stress-related protein, putative, expressed                                           |
| LOC_Os04g31120 | 3.0 | 0.00225 | 1.6 | 0.1 | up | OsFBK14 - F-box domain and kelch repeat containing protein, expressed                 |
| LOC_Os11g09160 | 3.0 | 0.00296 | 1.6 | 0.2 | up | B3 DNA binding domain containing protein, expressed                                   |
| LOC_Os05g30500 | 2.9 | 0.00181 | 1.6 | 0.1 | up | expressed protein                                                                     |
| LOC_Os08g44590 | 2.9 | 0.00334 | 1.6 | 0.2 | up | gibberellin 20 oxidase 2, putative, expressed                                         |
| LOC_Os08g42440 | 2.9 | 0.00067 | 1.6 | 0.0 | up | CCT/B-box zinc finger protein, putative, expressed                                    |
| LOC_Os01g68770 | 2.9 | 0.00194 | 1.5 | 0.1 | up | selenium-binding protein, putative, expressed                                         |
| LOC_Os01g57470 | 2.9 | 0.00384 | 1.5 | 0.2 | up | EF hand family protein, putative, expressed                                           |
| LOC_Os02g41840 | 2.9 | 0.00071 | 1.5 | 0.0 | up | DUF584 domain containing protein, putative, expressed                                 |
| LOC_Os03g55590 | 2.9 | 0.00292 | 1.5 | 0.2 | up | MYB family transcription factor, putative, expressed                                  |
| LOC_Os03g08000 | 2.9 | 0.00064 | 1.5 | 0.0 | up | expressed protein                                                                     |
| LOC_Os12g36110 | 2.9 | 0.00069 | 1.5 | 0.0 | up | calmodulin binding protein, putative, expressed                                       |
| LOC_Os03g22120 | 2.9 | 0.00173 | 1.5 | 0.1 | up | sucrose synthase, putative, expressed                                                 |
| LOC_Os02g56460 | 2.9 | 0.00148 | 1.5 | 0.1 | up | dehydrogenase, putative, expressed                                                    |
| LOC_Os12g39320 | 2.9 | 0.00074 | 1.5 | 0.0 | up | DUF221 domain containing protein, expressed                                           |
| LOC_Os02g39140 | 2.9 | 0.00356 | 1.5 | 0.2 | up | helix-loop-helix DNA-binding domain containing protein, expressed                     |
| LOC_Os03g33090 | 2.9 | 0.00141 | 1.5 | 0.1 | up | DUF260 domain containing protein, putative, expressed                                 |
| LOC_Os02g37260 | 2.9 | 0.00130 | 1.5 | 0.1 | up | hypothetical protein                                                                  |
| LOC_Os10g41330 | 2.9 | 0.00311 | 1.5 | 0.2 | up | AP2 domain containing protein, expressed                                              |
| LOC_Os01g12280 | 2.9 | 0.00142 | 1.5 | 0.1 | up | hAT dimerisation domain-containing protein, putative, expressed                       |
| LOC_Os10g39220 | 2.9 | 0.00209 | 1.5 | 0.1 | up | tobamovirus multiplication protein, putative, expressed                               |
| LOC_Os01g03980 | 2.9 | 0.00220 | 1.5 | 0.1 | up | expressed protein                                                                     |
| LOC_Os01g03890 | 2.9 | 0.00178 | 1.5 | 0.1 | up | DUF260 domain containing protein, putative, expressed                                 |
| LOC_Os03g17310 | 2.9 | 0.00095 | 1.5 | 0.1 | up | calcium-transporting ATPase, endoplasmic reticulum-type, putative, expressed          |
| LOC_Os01g04330 | 2.9 | 0.00067 | 1.5 | 0.0 | up | OsCML16 - Calmodulin-related calcium sensor protein, expressed                        |
| LOC_Os05g02390 | 2.9 | 0.00060 | 1.5 | 0.0 | up | ZOS5-02 - C2H2 zinc finger protein, expressed                                         |
| LOC_Os08g41720 | 2.9 | 0.00339 | 1.5 | 0.2 | up | auxin efflux carrier component, putative, expressed                                   |
| LOC_Os10g10130 | 2.9 | 0.00064 | 1.5 | 0.0 | up | OsWAK112d - OsWAK receptor-like protein kinase, expressed                             |
| LOC_Os03g28400 | 2.8 | 0.00720 | 1.5 | 0.3 | up | transport protein particle component, Bet3, domain containing protein, expressed      |
| LOC_Os07g10620 | 2.8 | 0.00616 | 1.5 | 0.2 | up | expressed protein                                                                     |
| LOC_Os06g40360 | 2.8 | 0.00296 | 1.5 | 0.1 | up | OsFBL30 - F-box domain and LRR containing protein, expressed                          |
| LOC_Os11g03820 | 2.8 | 0.00365 | 1.5 | 0.2 | up | D-mannose binding lectin family protein, expressed                                    |
| LOC_Os03g07830 | 2.8 | 0.00777 | 1.5 | 0.3 | up | AP2 domain containing protein, expressed                                              |
| LOC_Os05g40060 | 2.8 | 0.00703 | 1.5 | 0.3 | up | WRKY48, expressed                                                                     |
| LOC_Os05g33820 | 2.8 | 0.00030 | 1.5 | 0.0 | up | lipase, putative, expressed                                                           |
| LOC_Os05g01310 | 2.8 | 0.00159 | 1.5 | 0.1 | up | ankyrin repeat family protein, putative, expressed                                    |
| LOC_Os06g12876 | 2.8 | 0.00623 | 1.5 | 0.2 | up | expressed protein                                                                     |
| LOC_Os11g34720 | 2.8 | 0.00161 | 1.5 | 0.1 | up | Ser/Thr protein phosphatase family protein, putative, expressed                       |
| LOC_Os01g54890 | 2.8 | 0.00385 | 1.5 | 0.2 | up | ethylene-responsive transcription factor 2, putative, expressed                       |
| LOC_Os12g36640 | 2.8 | 0.02140 | 1.5 | 0.5 | up | universal stress protein domain containing protein, putative, expressed               |
| LOC_Os06g46950 | 2.8 | 0.00697 | 1.5 | 0.3 | up | EF hand family protein, putative, expressed                                           |
| LOC_Os03g18130 | 2.8 | 0.01481 | 1.5 | 0.4 | up | asparagine synthetase, putative, expressed                                            |
| LOC_Os02g52010 | 2.8 | 0.00146 | 1.5 | 0.1 | up | phosphate-induced protein 1 conserved region domain containing protein, expressed     |
| LOC_Os05g39770 | 2.8 | 0.00552 | 1.5 | 0.2 | up | aminotransferase, putative, expressed                                                 |
| LOC_Os07g06644 | 2.8 | 0.00083 | 1.5 | 0.0 | up | expressed protein                                                                     |
| LOC_Os03g06330 | 2.8 | 0.00088 | 1.5 | 0.1 | up | tyrosine protein kinase domain containing protein, putative, expressed                |
| LOC_Os03g44780 | 2.8 | 0.00337 | 1.5 | 0.2 | up | elongation factor Tu family protein, putative, expressed                              |
| LOC_Os01g07300 | 2.8 | 0.00079 | 1.5 | 0.0 | up | uncharacterized 50.6 kDa protein in the 5region of gyrA and gyrB, putative, expressed |
| LOC_Os12g04540 | 2.8 | 0.00679 | 1.5 | 0.2 | up | expressed protein                                                                     |
| LOC_Os01g11520 | 2.8 | 0.00252 | 1.5 | 0.1 | up | RING-H2 finger protein, putative, expressed                                           |
| LOC_Os10g32770 | 2.8 | 0.00154 | 1.5 | 0.1 | up | WD repeat-containing protein, putative, expressed                                     |
| LOC_Os02g32615 | 2.8 | 0.00451 | 1.5 | 0.2 | up | expressed protein                                                                     |
| LOC_Os03g29350 | 2.8 | 0.00889 | 1.5 | 0.3 | up | von Willebrand factor type A domain containing protein, expressed                     |
| LOC_Os03g04370 | 2.8 | 0.00185 | 1.5 | 0.1 | up | protein-methionine-S-oxide reductase, putative, expressed                             |
| LOC_Os06g45710 | 2.8 | 0.00101 | 1.5 | 0.1 | up | phosphoglycerate kinase protein, putative, expressed                                  |
| LOC_Os02g46690 | 2.8 | 0.00392 | 1.5 | 0.2 | up | OsFBD8 - F-box and FBD domain containing protein, expressed                           |
| LOC_Os10g36260 | 2.8 | 0.00065 | 1.5 | 0.0 | up | expressed protein                                                                     |
| LOC_Os09g09920 | 2.8 | 0.00448 | 1.5 | 0.2 | up | expressed protein                                                                     |
| LOC_Os12g33165 | 2.8 | 0.00410 | 1.5 | 0.2 | up | expressed protein                                                                     |
| LOC_Os10g26940 | 2.8 | 0.00243 | 1.5 | 0.1 | up | BURP domain containing protein, expressed                                             |
| LOC_Os12g44070 | 2.8 | 0.00663 | 1.5 | 0.2 | up | nodulin, putative, expressed                                                          |
| LOC_Os01g67820 | 2.8 | 0.00080 | 1.5 | 0.0 | up | exo70 exocyst complex subunit domain containing protein, expressed                    |
| LOC_Os05g38270 | 2.8 | 0.00095 | 1.5 | 0.1 | up | regulator of chromosome condensation, putative, expressed                             |
| LOC_Os04g32950 | 2.8 | 0.00430 | 1.5 | 0.2 | up | calreticulin precursor protein, putative, expressed                                   |
| LOC_Os02g37590 | 2.8 | 0.00391 | 1.5 | 0.2 | up | glycerophosphoryl diester phosphodiesterase family protein, putative, expressed       |
| LOC_Os03g08250 | 2.7 | 0.00067 | 1.5 | 0.0 | up | expressed protein                                                                     |
| LOC_Os02g52410 | 2.7 | 0.00151 | 1.5 | 0.1 | up | expressed protein                                                                     |
| LOC_Os01g57550 | 2.7 | 0.00590 | 1.5 | 0.2 | up | nodulation protein-related, putative, expressed                                       |
| LOC_Os10g03850 | 2.7 | 0.00067 | 1.5 | 0.0 | up | OsFBX352 - F-box domain containing protein, expressed                                 |
| LOC_Os05g41530 | 2.7 | 0.00179 | 1.5 | 0.1 | up | ZOS5-11 - C2H2 zinc finger protein, expressed                                         |
| LOC_Os02g41550 | 2.7 | 0.00211 | 1.4 | 0.1 | up | FAD binding domain of DNA photolyase domain containing protein, expressed             |
| LOC_Os07g44740 | 2.7 | 0.00128 | 1.4 | 0.1 | up | chaperonin, putative, expressed                                                       |
| LOC_Os03g53020 | 2.7 | 0.00347 | 1.4 | 0.2 | up | helix-loop-helix DNA-binding domain containing protein, expressed                     |
| LOC_Os06g47910 | 2.7 | 0.00812 | 1.4 | 0.3 | up | GDSL-like lipase/acylhydrolase, putative, expressed                                   |
| LOC_Os02g16040 | 2.7 | 0.00712 | 1.4 | 0.2 | up | ubiquitin-conjugating enzyme, putative, expressed                                     |
| LOC_Os10g30450 | 2.7 | 0.00250 | 1.4 | 0.1 | up | heavy-metal-associated domain-containing protein, putative, expressed                 |
| LOC_Os03g51479 | 2.7 | 0.00199 | 1.4 | 0.1 | up | maf, putative, expressed                                                              |
| LOC_Os03g47910 | 2.7 | 0.00294 | 1.4 | 0.1 | up | expressed protein                                                                     |
| LOC_Os03g18220 | 2.7 | 0.00353 | 1.4 | 0.2 | up | pyruvate decarboxylase isozyme 2, putative, expressed                                 |
| LOC_Os03g20949 | 2.7 | 0.00057 | 1.4 | 0.0 | up | phospholipid-transporting ATPase, putative, expressed                                 |
| LOC_Os07g38590 | 2.7 | 0.00269 | 1.4 | 0.1 | up | carboxyl-terminal peptidase, putative, expressed                                      |
| LOC_Os12g32580 | 2.7 | 0.00154 | 1.4 | 0.1 | up | expressed protein                                                                     |
| LOC_Os05g31040 | 2.7 | 0.00397 | 1.4 | 0.2 | up | cytokinin dehydrogenase precursor, putative, expressed                                |
| LOC_Os12g02210 | 2.7 | 0.00358 | 1.4 | 0.2 | up | RING finger protein, putative, expressed                                              |
| LOC_Os10g21560 | 2.7 | 0.00383 | 1.4 | 0.2 | up | no apical meristem protein, putative, expressed                                       |
| LOC_Os01g07730 | 2.7 | 0.00234 | 1.4 | 0.1 | up | phosphate/phosphoenolpyruvate translocator-related protein, putative, expressed       |
| LOC_Os01g09620 | 2.7 | 0.01127 | 1.4 | 0.3 | up | zinc finger/CCH transcription factor, putative, expressed                             |
| LOC_Os01g56530 | 2.7 | 0.00170 | 1.4 | 0.1 | up | DUF260 domain containing protein, putative, expressed                                 |
| LOC_Os12g36640 | 2.7 | 0.00204 | 1.4 | 0.1 | up | universal stress protein domain containing protein, putative, expressed               |
| LOC_Os02g26700 | 2.7 | 0.00188 | 1.4 | 0.1 | up | cation transport regulator-like protein 1, putative, expressed                        |
| LOC_Os02g34970 | 2.7 | 0.00235 | 1.4 | 0.1 | up | no apical meristem protein, putative, expressed                                       |

|                |     |         |     |     |    |                                                                                                                    |
|----------------|-----|---------|-----|-----|----|--------------------------------------------------------------------------------------------------------------------|
| LOC_Os02g58150 | 2.7 | 0.00351 | 1.4 | 0.2 | up | expressed protein                                                                                                  |
| LOC_Os08g38990 | 2.7 | 0.01956 | 1.4 | 0.4 | up | WRKY30, expressed                                                                                                  |
| LOC_Os05g41550 | 2.7 | 0.00480 | 1.4 | 0.2 | up | expressed protein                                                                                                  |
| LOC_Os03g39270 | 2.7 | 0.00206 | 1.4 | 0.1 | up | expressed protein                                                                                                  |
| LOC_Os10g32680 | 2.6 | 0.00288 | 1.4 | 0.1 | up | expressed protein                                                                                                  |
| LOC_Os03g13840 | 2.6 | 0.00128 | 1.4 | 0.1 | up | senescence-associated protein, putative, expressed                                                                 |
| LOC_Os01g51430 | 2.6 | 0.00207 | 1.4 | 0.1 | up | green ripe-like, putative, expressed                                                                               |
| LOC_Os01g61044 | 2.6 | 0.00230 | 1.4 | 0.1 | up | transmembrane amino acid transporter protein, putative, expressed                                                  |
| LOC_Os03g55090 | 2.6 | 0.00259 | 1.4 | 0.1 | up | alpha-glucan phosphorylase isozyme, putative, expressed                                                            |
| LOC_Os01g01610 | 2.6 | 0.00130 | 1.4 | 0.1 | up | IscA-like iron-sulfur assembly protein, mitochondrial precursor, putative, expressed                               |
| LOC_Os09g27040 | 2.6 | 0.00973 | 1.4 | 0.3 | up | GEX1, putative, expressed                                                                                          |
| LOC_Os02g28830 | 2.6 | 0.00390 | 1.4 | 0.2 | up | tetratricopeptide repeat domain containing protein, expressed                                                      |
| LOC_Os04g40470 | 2.6 | 0.00456 | 1.4 | 0.2 | up | cytochrome P450, putative, expressed                                                                               |
| LOC_Os02g52140 | 2.6 | 0.00126 | 1.4 | 0.1 | up | RNA recognition motif containing protein, putative, expressed                                                      |
| LOC_Os02g03280 | 2.6 | 0.00180 | 1.4 | 0.1 | up | transmembrane BAX inhibitor motif-containing protein, putative, expressed                                          |
| LOC_Os03g02550 | 2.6 | 0.00088 | 1.4 | 0.0 | up | OsFBX76 - F-box domain containing protein, expressed                                                               |
| LOC_Os08g38086 | 2.6 | 0.00084 | 1.4 | 0.0 | up | heat shock protein, putative, expressed                                                                            |
| LOC_Os02g32610 | 2.6 | 0.00740 | 1.4 | 0.2 | up | protein kinase domain containing protein, expressed                                                                |
| LOC_Os05g34325 | 2.6 | 0.00128 | 1.4 | 0.1 | up | cytochrome P450 51, putative, expressed                                                                            |
| LOC_Os08g16740 | 2.6 | 0.00128 | 1.4 | 0.1 | up | expressed protein                                                                                                  |
| LOC_Os04g48270 | 2.6 | 0.00531 | 1.4 | 0.2 | up | OsFBX148 - F-box domain containing protein, expressed                                                              |
| LOC_Os04g51080 | 2.6 | 0.00109 | 1.4 | 0.1 | up | scramblase, putative, expressed                                                                                    |
| LOC_Os01g08160 | 2.6 | 0.00181 | 1.4 | 0.1 | up | MYB family transcription factor, putative, expressed                                                               |
| LOC_Os04g58190 | 2.6 | 0.00130 | 1.4 | 0.1 | up | dof zinc finger domain containing protein, putative, expressed                                                     |
| LOC_Os04g31340 | 2.6 | 0.00103 | 1.4 | 0.1 | up | CBS domain containing membrane protein, putative, expressed                                                        |
| LOC_Os01g33784 | 2.6 | 0.00107 | 1.4 | 0.1 | up | lipase family protein, putative, expressed                                                                         |
| LOC_Os09g11460 | 2.6 | 0.00186 | 1.4 | 0.1 | up | AP2 domain containing protein, expressed                                                                           |
| LOC_Os02g18390 | 2.6 | 0.00226 | 1.4 | 0.1 | up | expressed protein                                                                                                  |
| LOC_Os01g21590 | 2.6 | 0.00172 | 1.4 | 0.1 | up | homeodomain, putative, expressed                                                                                   |
| LOC_Os01g39860 | 2.6 | 0.00157 | 1.4 | 0.1 | up | 1-aminocyclopropane-1-carboxylate oxidase protein, putative, expressed                                             |
| LOC_Os12g38270 | 2.6 | 0.00234 | 1.4 | 0.1 | up | metallothionein, putative, expressed                                                                               |
| LOC_Os12g33150 | 2.6 | 0.00290 | 1.4 | 0.1 | up | expressed protein                                                                                                  |
| LOC_Os07g47530 | 2.6 | 0.00191 | 1.4 | 0.1 | up | AAA-type ATPase family protein, putative, expressed                                                                |
| LOC_Os03g08270 | 2.6 | 0.00495 | 1.4 | 0.2 | up | ataxin-2 C-terminal region family protein, expressed                                                               |
| LOC_Os10g22520 | 2.6 | 0.00104 | 1.4 | 0.1 | up | cellulase, putative, expressed                                                                                     |
| LOC_Os03g51760 | 2.6 | 0.00227 | 1.4 | 0.1 | up | OsFBX109 - F-box domain containing protein, expressed                                                              |
| LOC_Os11g04954 | 2.6 | 0.00383 | 1.4 | 0.2 | up | DNA repair protein Rad51, putative, expressed                                                                      |
| LOC_Os01g46350 | 2.6 | 0.00230 | 1.4 | 0.1 | up | proteins of unknown function domain containing protein, expressed                                                  |
| LOC_Os03g42600 | 2.6 | 0.00233 | 1.4 | 0.1 | up | expressed protein                                                                                                  |
| LOC_Os09g11250 | 2.6 | 0.00842 | 1.4 | 0.3 | up | co-chaperone GrpE protein, putative, expressed                                                                     |
| LOC_Os09g33780 | 2.6 | 0.00230 | 1.4 | 0.1 | up | expressed protein                                                                                                  |
| LOC_Os11g08050 | 2.6 | 0.00349 | 1.4 | 0.1 | up | expressed protein                                                                                                  |
| LOC_Os01g60020 | 2.6 | 0.00353 | 1.4 | 0.1 | up | NAC domain transcription factor, putative, expressed                                                               |
| LOC_Os02g54350 | 2.6 | 0.00572 | 1.4 | 0.2 | up | hypothetical protein                                                                                               |
| LOC_Os04g55840 | 2.6 | 0.00725 | 1.4 | 0.2 | up | expressed protein                                                                                                  |
| LOC_Os01g50840 | 2.5 | 0.00677 | 1.3 | 0.2 | up | expressed protein                                                                                                  |
| LOC_Os03g57320 | 2.5 | 0.00560 | 1.3 | 0.2 | up | exp1 protein precursor, putative, expressed                                                                        |
| LOC_Os03g63970 | 2.5 | 0.00179 | 1.3 | 0.1 | up | gibberellin 20 oxidase 1, putative, expressed                                                                      |
| LOC_Os02g44500 | 2.5 | 0.00380 | 1.3 | 0.2 | up | glutathione peroxidase, putative, expressed                                                                        |
| LOC_Os05g10670 | 2.5 | 0.00320 | 1.3 | 0.1 | up | zinc finger CCH type family protein, putative, expressed                                                           |
| LOC_Os01g48950 | 2.5 | 0.00102 | 1.3 | 0.1 | up | expressed protein                                                                                                  |
| LOC_Os04g34970 | 2.5 | 0.00394 | 1.3 | 0.2 | up | AP2 domain containing protein, expressed                                                                           |
| LOC_Os01g16330 | 2.5 | 0.00173 | 1.3 | 0.1 | up | OsRhmbd2 - Putative Rhomboid homologue, expressed                                                                  |
| LOC_Os03g45740 | 2.5 | 0.00359 | 1.3 | 0.1 | up | transferase family protein, putative, expressed                                                                    |
| LOC_Os03g08624 | 2.5 | 0.00642 | 1.3 | 0.2 | up | dihydroflavonol-4-reductase, putative, expressed                                                                   |
| LOC_Os10g02920 | 2.5 | 0.00108 | 1.3 | 0.1 | up | cytochrome b561, putative, expressed                                                                               |
| LOC_Os02g55560 | 2.5 | 0.00101 | 1.3 | 0.1 | up | protein phosphatase 2C, putative, expressed                                                                        |
| LOC_Os03g51380 | 2.5 | 0.00405 | 1.3 | 0.2 | up | expressed protein                                                                                                  |
| LOC_Os02g44870 | 2.5 | 0.00086 | 1.3 | 0.0 | up | dehydrin, putative, expressed                                                                                      |
| LOC_Os01g16350 | 2.5 | 0.00196 | 1.3 | 0.1 | up | hydroxymethylglutaryl-CoA lyase, putative, expressed                                                               |
| LOC_Os12g36430 | 2.5 | 0.00250 | 1.3 | 0.1 | up | expressed protein                                                                                                  |
| LOC_Os03g20460 | 2.5 | 0.00102 | 1.3 | 0.1 | up | guanylate kinase, putative, expressed                                                                              |
| LOC_Os01g36820 | 2.5 | 0.02374 | 1.3 | 0.4 | up | expressed protein                                                                                                  |
| LOC_Os03g04840 | 2.5 | 0.04617 | 1.3 | 0.6 | up | expressed protein                                                                                                  |
| LOC_Os03g05900 | 2.5 | 0.00186 | 1.3 | 0.1 | up | expressed protein                                                                                                  |
| LOC_Os12g41930 | 2.5 | 0.00202 | 1.3 | 0.1 | up | SRP40, C-terminal domain containing protein, expressed                                                             |
| LOC_Os10g28040 | 2.5 | 0.00243 | 1.3 | 0.1 | up | histone acetyltransferase GCN5, putative, expressed                                                                |
| LOC_Os02g45160 | 2.5 | 0.00183 | 1.3 | 0.1 | up | aluminum-activated malate transporter, putative, expressed                                                         |
| LOC_Os12g21734 | 2.5 | 0.00250 | 1.3 | 0.1 | up | expressed protein                                                                                                  |
| LOC_Os01g06660 | 2.5 | 0.00245 | 1.3 | 0.1 | up | thiamine pyrophosphate enzyme, C-terminal TPP binding domain containing protein, expressed                         |
| LOC_Os01g54670 | 2.5 | 0.00213 | 1.3 | 0.1 | up | coiled-coil domain-containing protein 25, putative, expressed                                                      |
| LOC_Os04g41920 | 2.5 | 0.00740 | 1.3 | 0.2 | up | protein FAM133, putative, expressed                                                                                |
| LOC_Os03g58530 | 2.5 | 0.00367 | 1.3 | 0.1 | up | ES43 protein, putative, expressed                                                                                  |
| LOC_Os04g43820 | 2.5 | 0.00170 | 1.3 | 0.1 | up | expressed protein                                                                                                  |
| LOC_Os11g34270 | 2.5 | 0.00483 | 1.3 | 0.2 | up | ubiquitin carboxyl-terminal hydrolase domain containing protein, expressed                                         |
| LOC_Os07g43470 | 2.5 | 0.00111 | 1.3 | 0.1 | up | GTP-binding protein, putative, expressed                                                                           |
| LOC_Os01g50370 | 2.5 | 0.00192 | 1.3 | 0.1 | up | STE_MEKK_ste11_MAP3K4 - STE kinases include homologs to sterile 7, sterile 11 and sterile 20 from yeast, expressed |
| LOC_Os03g58160 | 2.5 | 0.00111 | 1.3 | 0.1 | up | heat stress transcription factor, putative, expressed                                                              |
| LOC_Os06g03580 | 2.5 | 0.00116 | 1.3 | 0.1 | up | zinc RING finger protein, putative, expressed                                                                      |
| LOC_Os03g52940 | 2.5 | 0.00290 | 1.3 | 0.1 | up | expressed protein                                                                                                  |
| LOC_Os09g04370 | 2.5 | 0.00328 | 1.3 | 0.1 | up | expressed protein                                                                                                  |
| LOC_Os06g45060 | 2.5 | 0.00071 | 1.3 | 0.0 | up | expressed protein                                                                                                  |
| LOC_Os03g59070 | 2.5 | 0.00110 | 1.3 | 0.1 | up | phosphatase, putative, expressed                                                                                   |
| LOC_Os05g04700 | 2.5 | 0.00400 | 1.3 | 0.2 | up | OsRC12-6 - Hydrophobic protein LT16B, expressed                                                                    |
| LOC_Os01g61180 | 2.5 | 0.00375 | 1.3 | 0.1 | up | exo70 exocyst complex subunit domain containing protein, expressed                                                 |
| LOC_Os04g39110 | 2.5 | 0.00126 | 1.3 | 0.1 | up | GASR4 - Gibberellin-regulated GASAGAST/Shakin family protein precursor, expressed                                  |
| LOC_Os08g33640 | 2.4 | 0.00290 | 1.3 | 0.1 | up | expressed protein                                                                                                  |
| LOC_Os02g33060 | 2.4 | 0.00767 | 1.3 | 0.2 | up | expressed protein                                                                                                  |
| LOC_Os09g28440 | 2.4 | 0.00359 | 1.3 | 0.1 | up | AP2 domain containing protein, expressed                                                                           |
| LOC_Os01g44050 | 2.4 | 0.00343 | 1.3 | 0.1 | up | siroheme synthase, putative, expressed                                                                             |
| LOC_Os03g49930 | 2.4 | 0.00621 | 1.3 | 0.2 | up | pentatricopeptide, putative, expressed                                                                             |
| LOC_Os11g10480 | 2.4 | 0.00102 | 1.3 | 0.1 | up | dehydrogenase, putative, expressed                                                                                 |
| LOC_Os02g35160 | 2.4 | 0.00065 | 1.3 | 0.0 | up | ligatin, putative, expressed                                                                                       |
| LOC_Os04g57739 | 2.4 | 0.00170 | 1.3 | 0.1 | up | expressed protein                                                                                                  |
| LOC_Os12g06550 | 2.4 | 0.00107 | 1.3 | 0.1 | up | expressed protein                                                                                                  |
| LOC_Os09g19930 | 2.4 | 0.00657 | 1.3 | 0.2 | up | HOTHEAD precursor, putative, expressed                                                                             |
| LOC_Os05g10754 | 2.4 | 0.00762 | 1.3 | 0.2 | up | expressed protein                                                                                                  |
| LOC_Os11g10470 | 2.4 | 0.00225 | 1.3 | 0.1 | up | expressed protein                                                                                                  |
| LOC_Os05g34050 | 2.4 | 0.00083 | 1.3 | 0.0 | up | bZIP transcription factor domain containing protein, expressed                                                     |
| LOC_Os11g39370 | 2.4 | 0.00163 | 1.3 | 0.1 | up | BRASSINOSTEROID INSENSITIVE 1-associated receptor kinase 1 precursor, putative, expressed                          |
| LOC_Os02g46473 | 2.4 | 0.00057 | 1.3 | 0.0 | up | expressed protein                                                                                                  |
| LOC_Os06g02440 | 2.4 | 0.00267 | 1.3 | 0.1 | up | expressed protein                                                                                                  |
| LOC_Os03g07190 | 2.4 | 0.00118 | 1.3 | 0.1 | up | expressed protein                                                                                                  |
| LOC_Os01g09430 | 2.4 | 0.00089 | 1.3 | 0.0 | up | expressed protein                                                                                                  |
| LOC_Os01g40760 | 2.4 | 0.00447 | 1.3 | 0.2 | up | expressed protein                                                                                                  |

|                |     |         |     |     |    |                                                                                                                             |
|----------------|-----|---------|-----|-----|----|-----------------------------------------------------------------------------------------------------------------------------|
| LOC_Os05g49420 | 2.4 | 0.00313 | 1.3 | 0.1 | up | transcription factor, putative, expressed                                                                                   |
| LOC_Os03g53750 | 2.4 | 0.00413 | 1.3 | 0.2 | up | nuclear prelamina A recognition factor, putative, expressed                                                                 |
| LOC_Os10g37210 | 2.4 | 0.00173 | 1.3 | 0.1 | up | FAD dependent oxidoreductase domain containing protein, expressed                                                           |
| LOC_Os12g04980 | 2.4 | 0.00223 | 1.3 | 0.1 | up | DNA repair protein Rad51, putative, expressed                                                                               |
| LOC_Os04g32740 | 2.4 | 0.00356 | 1.3 | 0.1 | up | hydrolase, NUDIX family, domain containing protein, expressed                                                               |
| LOC_Os01g68160 | 2.4 | 0.00311 | 1.3 | 0.1 | up | ZOS1-22 - C2H2 zinc finger protein, expressed                                                                               |
| LOC_Os09g21230 | 2.4 | 0.00343 | 1.3 | 0.1 | up | AMP-binding enzyme, putative, expressed                                                                                     |
| LOC_Os01g03480 | 2.4 | 0.00406 | 1.3 | 0.2 | up | expressed protein                                                                                                           |
| LOC_Os12g38490 | 2.4 | 0.00439 | 1.3 | 0.2 | up | SCARECROW, putative, expressed                                                                                              |
| LOC_Os04g43440 | 2.4 | 0.00178 | 1.3 | 0.1 | up | NB-ARC/LRR disease resistance protein, putative, expressed                                                                  |
| LOC_Os01g52740 | 2.4 | 0.00718 | 1.3 | 0.2 | up | expressed protein                                                                                                           |
| LOC_Os11g03910 | 2.4 | 0.03081 | 1.3 | 0.5 | up | zinc finger DHHC domain-containing protein, putative, expressed                                                             |
| LOC_Os06g03860 | 2.4 | 0.00470 | 1.2 | 0.2 | up | uncharacterized membrane protein, putative, expressed                                                                       |
| LOC_Os01g04660 | 2.4 | 0.01168 | 1.2 | 0.3 | up | lipid phosphatase protein, putative, expressed                                                                              |
| LOC_Os06g04020 | 2.4 | 0.00306 | 1.2 | 0.1 | up | histone H1, putative, expressed                                                                                             |
| LOC_Os01g01660 | 2.4 | 0.00104 | 1.2 | 0.1 | up | isoflavone reductase, putative, expressed                                                                                   |
| LOC_Os04g38970 | 2.4 | 0.00163 | 1.2 | 0.1 | up | protein binding protein, putative, expressed                                                                                |
| LOC_Os02g09690 | 2.4 | 0.00210 | 1.2 | 0.1 | up | expressed protein                                                                                                           |
| LOC_Os01g32770 | 2.4 | 0.00256 | 1.2 | 0.1 | up | DUF260 domain containing protein, putative, expressed                                                                       |
| LOC_Os04g56990 | 2.4 | 0.00282 | 1.2 | 0.1 | up | Myb-like DNA-binding domain containing protein, putative, expressed                                                         |
| LOC_Os12g10750 | 2.4 | 0.00347 | 1.2 | 0.1 | up | ARGOS, putative, expressed                                                                                                  |
| LOC_Os01g63720 | 2.4 | 0.00436 | 1.2 | 0.2 | up | hypothetical protein                                                                                                        |
| LOC_Os02g16909 | 2.4 | 0.00856 | 1.2 | 0.2 | up | dynein light chain type 1 domain containing protein, expressed                                                              |
| LOC_Os01g09280 | 2.4 | 0.00707 | 1.2 | 0.2 | up | myb-related transcription activator, putative, expressed                                                                    |
| LOC_Os07g48560 | 2.4 | 0.00088 | 1.2 | 0.0 | up | homeobox domain containing protein, expressed                                                                               |
| LOC_Os01g58890 | 2.4 | 0.00181 | 1.2 | 0.1 | up | cysteine proteinase inhibitor precursor protein, putative, expressed                                                        |
| LOC_Os06g15560 | 2.4 | 0.00765 | 1.2 | 0.2 | up | expressed protein                                                                                                           |
| LOC_Os07g34710 | 2.4 | 0.00599 | 1.2 | 0.2 | up | peroxidase precursor, putative, expressed                                                                                   |
| LOC_Os05g15530 | 2.4 | 0.00588 | 1.2 | 0.2 | up | aminotransferase domain containing protein, putative, expressed                                                             |
| LOC_Os07g48040 | 2.4 | 0.02264 | 1.2 | 0.4 | up | peroxidase precursor, putative, expressed                                                                                   |
| LOC_Os01g70710 | 2.4 | 0.00111 | 1.2 | 0.1 | up | heavy metal-associated domain containing protein, expressed                                                                 |
| LOC_Os01g46340 | 2.4 | 0.00554 | 1.2 | 0.2 | up | chloroplast unusual positioning protein, putative, expressed                                                                |
| LOC_Os10g41820 | 2.4 | 0.00353 | 1.2 | 0.1 | up | dynamins family protein, putative, expressed                                                                                |
| LOC_Os06g49500 | 2.3 | 0.00454 | 1.2 | 0.2 | up | integral membrane protein, putative, expressed                                                                              |
| LOC_Os09g26490 | 2.3 | 0.00347 | 1.2 | 0.1 | up | alpha/beta hydrolase fold, putative, expressed                                                                              |
| LOC_Os01g05960 | 2.3 | 0.00173 | 1.2 | 0.1 | up | receptor kinase, putative, expressed                                                                                        |
| LOC_Os07g35740 | 2.3 | 0.00219 | 1.2 | 0.1 | up | TKL_IRAK_DUF26-ld.2 - DUF26 kinases have homology to DUF26 containing loci, expressed                                       |
| LOC_Os09g39860 | 2.3 | 0.00060 | 1.2 | 0.0 | up | protein kinase family protein, putative, expressed                                                                          |
| LOC_Os02g55600 | 2.3 | 0.00173 | 1.2 | 0.1 | up | expressed protein                                                                                                           |
| LOC_Os09g30090 | 2.3 | 0.00515 | 1.2 | 0.2 | up | WD domain, G-beta repeat domain containing protein, expressed                                                               |
| LOC_Os02g50710 | 2.3 | 0.00230 | 1.2 | 0.1 | up | expressed protein                                                                                                           |
| LOC_Os10g22520 | 2.3 | 0.00655 | 1.2 | 0.2 | up | cellulase, putative, expressed                                                                                              |
| LOC_Os04g52550 | 2.3 | 0.00553 | 1.2 | 0.2 | up | PAZ domain-containing protein, putative, expressed                                                                          |
| LOC_Os01g43090 | 2.3 | 0.00372 | 1.2 | 0.1 | up | oxidoreductase, aldo/keto reductase family protein, putative, expressed                                                     |
| LOC_Os06g03810 | 2.3 | 0.00433 | 1.2 | 0.2 | up | expressed protein                                                                                                           |
| LOC_Os05g45750 | 2.3 | 0.00445 | 1.2 | 0.2 | up | ATP-dependent Clp protease ATP-binding subunit clpX, putative, expressed                                                    |
| LOC_Os02g52040 | 2.3 | 0.01095 | 1.2 | 0.3 | up | phosphate-induced protein 1 conserved region domain containing protein, expressed                                           |
| LOC_Os02g47390 | 2.3 | 0.00195 | 1.2 | 0.1 | up | expressed protein                                                                                                           |
| LOC_Os11g05494 | 2.3 | 0.00765 | 1.2 | 0.2 | up | expressed protein                                                                                                           |
| LOC_Os08g43390 | 2.3 | 0.00520 | 1.2 | 0.2 | up | cytochrome P450, putative, expressed                                                                                        |
| LOC_Os01g39600 | 2.3 | 0.00195 | 1.2 | 0.1 | up | expressed protein                                                                                                           |
| LOC_Os09g23780 | 2.3 | 0.01421 | 1.2 | 0.3 | up | expressed protein                                                                                                           |
| LOC_Os11g09010 | 2.3 | 0.00660 | 1.2 | 0.2 | up | lipase, putative, expressed                                                                                                 |
| LOC_Os12g17804 | 2.3 | 0.00516 | 1.2 | 0.2 | up | expressed protein                                                                                                           |
| LOC_Os05g29050 | 2.3 | 0.00494 | 1.2 | 0.2 | up | phospholipase D p1, putative, expressed                                                                                     |
| LOC_Os04g51920 | 2.3 | 0.00607 | 1.2 | 0.2 | up | protein disulfide isomerase, putative, expressed                                                                            |
| LOC_Os03g64219 | 2.3 | 0.00102 | 1.2 | 0.0 | up | OTU-like cysteine protease family protein, putative, expressed                                                              |
| LOC_Os05g44100 | 2.3 | 0.00484 | 1.2 | 0.2 | up | trehalose synthase, putative, expressed                                                                                     |
| LOC_Os01g45830 | 2.3 | 0.00098 | 1.2 | 0.0 | up | sulfate transporter, putative, expressed                                                                                    |
| LOC_Os01g54550 | 2.3 | 0.00802 | 1.2 | 0.2 | up | HSF-type DNA-binding domain containing protein, expressed                                                                   |
| LOC_Os11g47310 | 2.3 | 0.01955 | 1.2 | 0.4 | up | receptor kinase-like protein, identical, putative, expressed                                                                |
| LOC_Os03g58800 | 2.3 | 0.00065 | 1.2 | 0.0 | up | ATPase, putative, expressed                                                                                                 |
| LOC_Os01g68020 | 2.3 | 0.00235 | 1.2 | 0.1 | up | BTBZZ - Bric-a-Brac, Tramtrack, and Broad Complex BTB domain with TAZ zinc finger and Calmodulin-binding domains, expressed |
| LOC_Os07g37290 | 2.3 | 0.00174 | 1.2 | 0.1 | up | expressed protein                                                                                                           |
| LOC_Os03g52690 | 2.3 | 0.00280 | 1.2 | 0.1 | up | CBS domain containing membrane protein, putative, expressed                                                                 |
| LOC_Os08g07720 | 2.3 | 0.00074 | 1.2 | 0.0 | up | transferase family protein, putative, expressed                                                                             |
| LOC_Os08g10150 | 2.3 | 0.00261 | 1.2 | 0.1 | up | SHR5-receptor-like kinase, putative, expressed                                                                              |
| LOC_Os04g53998 | 2.3 | 0.00305 | 1.2 | 0.1 | up | kinase, putative, expressed                                                                                                 |
| LOC_Os01g04540 | 2.3 | 0.00169 | 1.2 | 0.1 | up | serine/threonine-protein kinase At1g18390 precursor, putative, expressed                                                    |
| LOC_Os11g40249 | 2.3 | 0.00413 | 1.2 | 0.1 | up | expressed protein                                                                                                           |
| LOC_Os04g45730 | 2.3 | 0.00150 | 1.2 | 0.1 | up | protein kinase domain containing protein, expressed                                                                         |
| LOC_Os06g14670 | 2.3 | 0.00459 | 1.2 | 0.2 | up | ODORANT1, putative, expressed                                                                                               |
| LOC_Os06g21550 | 2.3 | 0.00101 | 1.2 | 0.0 | up | thioredoxin domain-containing protein 17, putative, expressed                                                               |
| LOC_Os03g19850 | 2.3 | 0.01634 | 1.2 | 0.3 | up | expressed protein                                                                                                           |
| LOC_Os04g54830 | 2.3 | 0.00194 | 1.2 | 0.1 | up | expressed protein                                                                                                           |
| LOC_Os11g47580 | 2.3 | 0.02151 | 1.2 | 0.4 | up | glycosyl hydrolase, putative, expressed                                                                                     |
| LOC_Os01g52730 | 2.3 | 0.00168 | 1.2 | 0.1 | up | DUF584 domain containing protein, putative, expressed                                                                       |
| LOC_Os11g29630 | 2.3 | 0.00409 | 1.2 | 0.1 | up | expressed protein                                                                                                           |
| LOC_Os03g47280 | 2.3 | 0.00754 | 1.2 | 0.2 | up | VQ domain containing protein, putative, expressed                                                                           |
| LOC_Os05g50470 | 2.3 | 0.00777 | 1.2 | 0.2 | up | expressed protein                                                                                                           |
| LOC_Os10g30850 | 2.3 | 0.00351 | 1.2 | 0.1 | up | zinc finger, RING-type, putative, expressed                                                                                 |
| LOC_Os03g19260 | 2.3 | 0.00280 | 1.2 | 0.1 | up | expressed protein                                                                                                           |
| LOC_Os08g13000 | 2.3 | 0.01050 | 1.2 | 0.2 | up | MBT20 - Bric-a-Brac, Tramtrack, Broad Complex BTB domain with Mepirin and TRAF Homology MATH domain, expressed              |
| LOC_Os02g32520 | 2.3 | 0.00349 | 1.2 | 0.1 | up | ERD1 protein, chloroplast precursor, putative, expressed                                                                    |
| LOC_Os04g30250 | 2.3 | 0.00150 | 1.2 | 0.1 | up | wall-associated receptor kinase-like 5 precursor, putative, expressed                                                       |
| LOC_Os01g56480 | 2.3 | 0.00543 | 1.2 | 0.2 | up | expressed protein                                                                                                           |
| LOC_Os02g10440 | 2.3 | 0.00568 | 1.2 | 0.2 | up | protein with a conserved N-terminal region, putative, expressed                                                             |
| LOC_Os03g28080 | 2.3 | 0.01090 | 1.2 | 0.3 | up | ring-H2 zinc finger protein, putative, expressed                                                                            |
| LOC_Os02g33720 | 2.3 | 0.00128 | 1.2 | 0.1 | up | RING-H2 finger protein, putative, expressed                                                                                 |
| LOC_Os05g44900 | 2.3 | 0.00222 | 1.2 | 0.1 | up | expressed protein                                                                                                           |
| LOC_Os03g63150 | 2.3 | 0.00283 | 1.2 | 0.1 | up | powdery mildew resistance protein PM3b, putative, expressed                                                                 |
| LOC_Os08g36030 | 2.3 | 0.00513 | 1.2 | 0.2 | up | plant viral response family protein, putative, expressed                                                                    |
| LOC_Os08g34190 | 2.3 | 0.00235 | 1.2 | 0.1 | up | stromal cell-derived factor 2-like protein precursor, putative, expressed                                                   |
| LOC_Os11g34700 | 2.3 | 0.01050 | 1.2 | 0.2 | up | ZOS11-04 - C2H2 zinc finger protein, expressed                                                                              |
| LOC_Os05g23320 | 2.3 | 0.00182 | 1.2 | 0.1 | up | expressed protein                                                                                                           |
| LOC_Os02g52490 | 2.2 | 0.00239 | 1.2 | 0.1 | up | expressed protein                                                                                                           |
| LOC_Os01g64020 | 2.2 | 0.00369 | 1.2 | 0.1 | up | transcription factor, putative, expressed                                                                                   |
| LOC_Os06g12370 | 2.2 | 0.00192 | 1.2 | 0.1 | up | OsFtsH6 FtsH protease, homologue of AIFtsH6, expressed                                                                      |
| LOC_Os08g33150 | 2.2 | 0.00138 | 1.2 | 0.1 | up | MYB family transcription factor, putative, expressed                                                                        |
| LOC_Os02g56820 | 2.2 | 0.01202 | 1.2 | 0.3 | up | OsFBX69 - F-box domain containing protein, expressed                                                                        |
| LOC_Os01g59910 | 2.2 | 0.03576 | 1.2 | 0.5 | up | OsFBX29 - F-box domain containing protein, expressed                                                                        |
| LOC_Os02g33770 | 2.2 | 0.00147 | 1.2 | 0.1 | up | homeodomain, putative, expressed                                                                                            |
| LOC_Os03g39230 | 2.2 | 0.00340 | 1.2 | 0.1 | up | OTU-like cysteine protease family protein, putative, expressed                                                              |
| LOC_Os03g22170 | 2.2 | 0.00079 | 1.2 | 0.0 | up | AP2 domain containing protein, expressed                                                                                    |
| LOC_Os03g03410 | 2.2 | 0.00230 | 1.2 | 0.1 | up | serine/threonine-protein kinase, putative, expressed                                                                        |

|                |     |         |     |     |    |                                                                                               |
|----------------|-----|---------|-----|-----|----|-----------------------------------------------------------------------------------------------|
| LOC_Os04g28805 | 2.2 | 0.00234 | 1.2 | 0.1 | up | expressed protein                                                                             |
| LOC_Os03g08830 | 2.2 | 0.00116 | 1.2 | 0.1 | up | WD domain, G-beta repeat domain containing protein, expressed                                 |
| LOC_Os05g39310 | 2.2 | 0.00362 | 1.2 | 0.1 | up | thiamine pyrophosphate enzyme, C-terminal TPP binding domain containing protein, expressed    |
| LOC_Os01g55240 | 2.2 | 0.00356 | 1.2 | 0.1 | up | gibberellin 2-beta-dioxygenase, putative, expressed                                           |
| LOC_Os03g04050 | 2.2 | 0.00634 | 1.2 | 0.2 | up | protein kinase family protein, putative, expressed                                            |
| LOC_Os02g09830 | 2.2 | 0.02242 | 1.2 | 0.4 | up | bZIP transcription factor domain containing protein, expressed                                |
| LOC_Os02g55840 | 2.2 | 0.00145 | 1.2 | 0.1 | up | expressed protein                                                                             |
| LOC_Os03g61670 | 2.2 | 0.00165 | 1.2 | 0.1 | up | calreticulin precursor, putative, expressed                                                   |
| LOC_Os06g12090 | 2.2 | 0.00380 | 1.2 | 0.1 | up | miro, putative, expressed                                                                     |
| LOC_Os06g22960 | 2.2 | 0.00293 | 1.2 | 0.1 | up | aquaporin protein, putative, expressed                                                        |
| LOC_Os08g19670 | 2.2 | 0.00200 | 1.2 | 0.1 | up | expressed protein                                                                             |
| LOC_Os01g04800 | 2.2 | 0.00194 | 1.2 | 0.1 | up | B3 DNA binding domain containing protein, expressed                                           |
| LOC_Os10g40420 | 2.2 | 0.00092 | 1.2 | 0.0 | up | LTPL138 - Protease inhibitor/seed storage/LTP family protein precursor, expressed             |
| LOC_Os11g40070 | 2.2 | 0.00126 | 1.2 | 0.1 | up | expressed protein                                                                             |
| LOC_Os07g46555 | 2.2 | 0.00660 | 1.1 | 0.2 | up | F-box domain containing protein, expressed                                                    |
| LOC_Os01g34790 | 2.2 | 0.00259 | 1.1 | 0.1 | up | expressed protein                                                                             |
| LOC_Os01g10110 | 2.2 | 0.00732 | 1.1 | 0.2 | up | cytokinin dehydrogenase precursor, putative, expressed                                        |
| LOC_Os03g06400 | 2.2 | 0.00767 | 1.1 | 0.2 | up | expressed protein                                                                             |
| LOC_Os11g38790 | 2.2 | 0.02437 | 1.1 | 0.4 | up | expressed protein                                                                             |
| LOC_Os03g12879 | 2.2 | 0.00509 | 1.1 | 0.2 | up | expressed protein                                                                             |
| LOC_Os05g01140 | 2.2 | 0.00571 | 1.1 | 0.2 | up | methyltransferase, putative, expressed                                                        |
| LOC_Os04g35560 | 2.2 | 0.00057 | 1.1 | 0.0 | up | glutathione S-transferase, putative, expressed                                                |
| LOC_Os05g04150 | 2.2 | 0.00356 | 1.1 | 0.1 | up | expressed protein                                                                             |
| LOC_Os01g09700 | 2.2 | 0.00178 | 1.1 | 0.1 | up | aminotransferase, classes I and II, domain containing protein, expressed                      |
| LOC_Os10g03760 | 2.2 | 0.00583 | 1.1 | 0.2 | up | OsFBX350 - F-box domain containing protein, expressed                                         |
| LOC_Os02g42250 | 2.2 | 0.00465 | 1.1 | 0.2 | up | 5-azacytidine resistance protein related, putative, expressed                                 |
| LOC_Os12g38051 | 2.2 | 0.00096 | 1.1 | 0.0 | up | metallothionein, putative, expressed                                                          |
| LOC_Os02g42350 | 2.2 | 0.00102 | 1.1 | 0.0 | up | nitrilase, putative, expressed                                                                |
| LOC_Os04g42720 | 2.2 | 0.00872 | 1.1 | 0.2 | up | TMS membrane protein/tumour differentially expressed protein, putative, expressed             |
| LOC_Os03g55630 | 2.2 | 0.00481 | 1.1 | 0.2 | up | expressed protein                                                                             |
| LOC_Os07g17560 | 2.2 | 0.00363 | 1.1 | 0.1 | up | expressed protein                                                                             |
| LOC_Os06g38430 | 2.2 | 0.00507 | 1.1 | 0.2 | up | expressed protein                                                                             |
| LOC_Os03g17670 | 2.2 | 0.00149 | 1.1 | 0.1 | up | expressed protein                                                                             |
| LOC_Os05g39690 | 2.2 | 0.00113 | 1.1 | 0.1 | up | oxidoreductase, aldo/keto reductase family protein, putative, expressed                       |
| LOC_Os08g40919 | 2.2 | 0.01013 | 1.1 | 0.2 | up | expressed protein                                                                             |
| LOC_Os05g50470 | 2.2 | 0.00139 | 1.1 | 0.1 | up | expressed protein                                                                             |
| LOC_Os02g13640 | 2.2 | 0.00227 | 1.1 | 0.1 | up | protein phosphatase 1 regulatory subunit SDS22, putative, expressed                           |
| LOC_Os07g38740 | 2.2 | 0.01735 | 1.1 | 0.3 | up | expressed protein                                                                             |
| LOC_Os11g32380 | 2.2 | 0.00261 | 1.1 | 0.1 | up | expressed protein                                                                             |
| LOC_Os06g24190 | 2.2 | 0.00102 | 1.1 | 0.0 | up | expressed protein                                                                             |
| LOC_Os12g42620 | 2.2 | 0.01432 | 1.1 | 0.3 | up | hypothetical protein                                                                          |
| LOC_Os04g40020 | 2.2 | 0.00867 | 1.1 | 0.2 | up | expressed protein                                                                             |
| LOC_Os11g32780 | 2.2 | 0.00196 | 1.1 | 0.1 | up | expressed protein                                                                             |
| LOC_Os02g07690 | 2.2 | 0.00155 | 1.1 | 0.1 | up | VQ domain containing protein, putative, expressed                                             |
| LOC_Os08g11760 | 2.2 | 0.04431 | 1.1 | 0.5 | up | expressed protein                                                                             |
| LOC_Os01g15010 | 2.2 | 0.00160 | 1.1 | 0.1 | up | miro, putative, expressed                                                                     |
| LOC_Os01g57420 | 2.2 | 0.00064 | 1.1 | 0.0 | up | diacylglycerol kinase, putative, expressed                                                    |
| LOC_Os03g22390 | 2.2 | 0.00328 | 1.1 | 0.1 | up | universal stress protein domain containing protein, putative, expressed                       |
| LOC_Os03g21480 | 2.2 | 0.00138 | 1.1 | 0.1 | up | HAD superfamily phosphatase, putative, expressed                                              |
| LOC_Os07g07480 | 2.2 | 0.00093 | 1.1 | 0.0 | up | HNH endonuclease domain-containing protein, putative, expressed                               |
| LOC_Os03g06410 | 2.2 | 0.00446 | 1.1 | 0.1 | up | protein kinase domain containing protein, expressed                                           |
| LOC_Os09g36770 | 2.2 | 0.00552 | 1.1 | 0.2 | up | NTMC2Type1.2 protein, putative, expressed                                                     |
| LOC_Os01g09800 | 2.2 | 0.00151 | 1.1 | 0.1 | up | BTBA1 - Bric-a-Brac,Tramtrack, Broad Complex BTB domain with Ankyrin repeat region, expressed |
| LOC_Os07g47510 | 2.2 | 0.00333 | 1.1 | 0.1 | up | stress-related protein, putative, expressed                                                   |
| LOC_Os11g05070 | 2.2 | 0.00238 | 1.1 | 0.1 | up | sodium/calcium exchanger protein, putative, expressed                                         |
| LOC_Os08g44015 | 2.2 | 0.00361 | 1.1 | 0.1 | up | growth regulator related protein, putative, expressed                                         |
| LOC_Os08g37950 | 2.2 | 0.00073 | 1.1 | 0.0 | up | copper-transporting ATPase PAA1, putative, expressed                                          |
| LOC_Os01g67330 | 2.2 | 0.00145 | 1.1 | 0.1 | up | nucleotide-sugar transporter family protein, putative, expressed                              |
| LOC_Os05g35650 | 2.2 | 0.01458 | 1.1 | 0.3 | up | peptide transporter PTR2, putative, expressed                                                 |
| LOC_Os02g02780 | 2.2 | 0.00761 | 1.1 | 0.2 | up | protein kinase family protein, putative, expressed                                            |
| LOC_Os01g39850 | 2.2 | 0.00573 | 1.1 | 0.2 | up | histone-like transcription factor and archaeal histone, putative, expressed                   |
| LOC_Os09g37500 | 2.2 | 0.00355 | 1.1 | 0.1 | up | OsSAUR55 - Auxin-responsive SAUR gene family member, expressed                                |
| LOC_Os02g02524 | 2.2 | 0.00113 | 1.1 | 0.0 | up | canopy homolog 2 precursor, putative, expressed                                               |
| LOC_Os02g49770 | 2.2 | 0.00083 | 1.1 | 0.0 | up | NHL repeat-containing protein, putative, expressed                                            |
| LOC_Os06g23740 | 2.2 | 0.03829 | 1.1 | 0.5 | up | expressed protein                                                                             |
| LOC_Os06g43960 | 2.2 | 0.00278 | 1.1 | 0.1 | up | expressed protein                                                                             |
| LOC_Os12g40770 | 2.2 | 0.00202 | 1.1 | 0.1 | up | ankyrin-1, putative, expressed                                                                |
| LOC_Os05g06410 | 2.2 | 0.00446 | 1.1 | 0.1 | up | expressed protein                                                                             |
| LOC_Os11g07230 | 2.2 | 0.00440 | 1.1 | 0.1 | up | receptor kinase, putative, expressed                                                          |
| LOC_Os05g37450 | 2.2 | 0.00887 | 1.1 | 0.2 | up | starch binding domain containing protein, putative, expressed                                 |
| LOC_Os07g47350 | 2.2 | 0.03717 | 1.1 | 0.4 | up | potassium transporter, putative, expressed                                                    |
| LOC_Os03g15270 | 2.2 | 0.00172 | 1.1 | 0.1 | up | gibberellin receptor GID1L2, putative, expressed                                              |
| LOC_Os04g42910 | 2.2 | 0.00234 | 1.1 | 0.1 | up | expressed protein                                                                             |
| LOC_Os04g57810 | 2.2 | 0.00040 | 1.1 | 0.0 | up | GA18008-PA, putative, expressed                                                               |
| LOC_Os05g34710 | 2.2 | 0.00575 | 1.1 | 0.2 | up | expressed protein                                                                             |
| LOC_Os05g33080 | 2.2 | 0.00271 | 1.1 | 0.1 | up | serine/threonine-protein kinase, putative, expressed                                          |
| LOC_Os04g32580 | 2.2 | 0.00126 | 1.1 | 0.1 | up | expressed protein                                                                             |
| LOC_Os01g63410 | 2.1 | 0.00535 | 1.1 | 0.2 | up | expressed protein                                                                             |
| LOC_Os10g20470 | 2.1 | 0.00114 | 1.1 | 0.0 | up | MATE efflux family protein, putative, expressed                                               |
| LOC_Os09g32330 | 2.1 | 0.00668 | 1.1 | 0.2 | up | expressed protein                                                                             |
| LOC_Os03g17060 | 2.1 | 0.00314 | 1.1 | 0.1 | up | RNA recognition motif containing protein, putative, expressed                                 |
| LOC_Os06g35500 | 2.1 | 0.00311 | 1.1 | 0.1 | up | expressed protein                                                                             |
| LOC_Os02g45780 | 2.1 | 0.00513 | 1.1 | 0.2 | up | zinc finger, C3HC4 type domain containing protein, expressed                                  |
| LOC_Os02g02920 | 2.1 | 0.00194 | 1.1 | 0.1 | up | HVA22, putative, expressed                                                                    |
| LOC_Os10g39090 | 2.1 | 0.00894 | 1.1 | 0.2 | up | hydrolase, alpha/beta fold family protein, putative, expressed                                |
| LOC_Os03g25050 | 2.1 | 0.00211 | 1.1 | 0.1 | up | chaperonin, putative, expressed                                                               |
| LOC_Os07g48820 | 2.1 | 0.00071 | 1.1 | 0.0 | up | transcription factor, putative, expressed                                                     |
| LOC_Os09g27050 | 2.1 | 0.00573 | 1.1 | 0.2 | up | HD domain containing protein, putative, expressed                                             |
| LOC_Os05g35110 | 2.1 | 0.00806 | 1.1 | 0.2 | up | OsFBL22 - F-box domain and LRR containing protein, expressed                                  |
| LOC_Os04g48830 | 2.1 | 0.00814 | 1.1 | 0.2 | up | DUF623 domain containing protein, expressed                                                   |
| LOC_Os01g35230 | 2.1 | 0.00786 | 1.1 | 0.2 | up | 1-aminocyclopropane-1-carboxylate oxidase homolog 1, putative, expressed                      |
| LOC_Os02g46910 | 2.1 | 0.01479 | 1.1 | 0.3 | up | glycosyl hydrolases family 16, putative, expressed                                            |
| LOC_Os09g27010 | 2.1 | 0.00057 | 1.1 | 0.0 | up | tyrosine protein kinase domain containing protein, putative, expressed                        |
| LOC_Os03g58250 | 2.1 | 0.00161 | 1.1 | 0.1 | up | bZIP transcription factor domain containing protein, expressed                                |
| LOC_Os01g14090 | 2.1 | 0.00455 | 1.1 | 0.1 | up | kinesin motor domain containing protein, putative, expressed                                  |
| LOC_Os05g38000 | 2.1 | 0.00670 | 1.1 | 0.2 | up | ATROPGEF7/ROPGEF7, putative, expressed                                                        |
| LOC_Os12g39710 | 2.1 | 0.00227 | 1.1 | 0.1 | up | expressed protein                                                                             |
| LOC_Os11g08950 | 2.1 | 0.00102 | 1.1 | 0.0 | up | protein kinase family protein, putative, expressed                                            |
| LOC_Os12g06020 | 2.1 | 0.00417 | 1.1 | 0.1 | up | mRNA-decapping enzyme, putative, expressed                                                    |
| LOC_Os12g32610 | 2.1 | 0.01091 | 1.1 | 0.2 | up | expressed protein                                                                             |
| LOC_Os09g27260 | 2.1 | 0.01699 | 1.1 | 0.3 | up | plant viral response family protein, putative, expressed                                      |
| LOC_Os01g64520 | 2.1 | 0.00185 | 1.1 | 0.1 | up | uricase, putative, expressed                                                                  |
| LOC_Os03g57120 | 2.1 | 0.00345 | 1.1 | 0.1 | up | ferredoxin-NADP reductase, chloroplast precursor, putative, expressed                         |
| LOC_Os02g09060 | 2.1 | 0.02794 | 1.1 | 0.4 | up | BRCA1-associated protein, putative, expressed                                                 |
| LOC_Os05g12481 | 2.1 | 0.00334 | 1.1 | 0.1 | up | expressed protein                                                                             |



|                |     |         |     |     |    |                                                                                                 |
|----------------|-----|---------|-----|-----|----|-------------------------------------------------------------------------------------------------|
| LOC_Os07g42510 | 2.1 | 0.00570 | 1.1 | 0.2 | up | AP2 domain containing protein, expressed                                                        |
| LOC_Os11g08380 | 2.1 | 0.00728 | 1.1 | 0.2 | up | 1-aminocyclopropane-1-carboxylate oxidase, putative, expressed                                  |
| LOC_Os01g47280 | 2.1 | 0.01098 | 1.1 | 0.2 | up | expressed protein                                                                               |
| LOC_Os01g48446 | 2.1 | 0.00147 | 1.1 | 0.1 | up | no apical meristem protein, putative, expressed                                                 |
| LOC_Os05g19970 | 2.1 | 0.00211 | 1.1 | 0.1 | up | ZOS5-06 - C2H2 zinc finger protein, expressed                                                   |
| LOC_Os04g47190 | 2.1 | 0.00181 | 1.1 | 0.1 | up | aminotransferase domain containing protein, putative, expressed                                 |
| LOC_Os08g43210 | 2.1 | 0.00878 | 1.1 | 0.2 | up | AP2 domain containing protein, expressed                                                        |
| LOC_Os01g64250 | 2.1 | 0.00138 | 1.1 | 0.1 | up | hemerythrin family protein, expressed                                                           |
| LOC_Os02g48110 | 2.1 | 0.00169 | 1.1 | 0.1 | up | DnaK family protein, putative, expressed                                                        |
| LOC_Os08g02690 | 2.1 | 0.01377 | 1.1 | 0.3 | up | MA3 domain containing protein, expressed                                                        |
| LOC_Os07g07550 | 2.1 | 0.00598 | 1.1 | 0.2 | up | galactose-1-phosphate uridylyl transferase, putative, expressed                                 |
| LOC_Os04g51880 | 2.1 | 0.00261 | 1.1 | 0.1 | up | GHMP kinases ATP-binding protein, putative, expressed                                           |
| LOC_Os07g20340 | 2.1 | 0.00645 | 1.1 | 0.2 | up | heavy metal-associated domain containing protein, expressed                                     |
| LOC_Os02g10830 | 2.1 | 0.00150 | 1.1 | 0.1 | up | serine acetyltransferase protein, putative, expressed                                           |
| LOC_Os03g19375 | 2.1 | 0.00114 | 1.1 | 0.0 | up | expressed protein                                                                               |
| LOC_Os04g31270 | 2.1 | 0.00255 | 1.1 | 0.1 | up | EMB1688, putative, expressed                                                                    |
| LOC_Os10g08026 | 2.1 | 0.00176 | 1.1 | 0.1 | up | lecithin:cholesterol acyltransferase, putative, expressed                                       |
| LOC_Os03g60850 | 2.1 | 0.03272 | 1.1 | 0.4 | up | peptide transporter PTR2, putative, expressed                                                   |
| LOC_Os08g40940 | 2.1 | 0.01470 | 1.1 | 0.3 | up | expressed protein                                                                               |
| LOC_Os05g45320 | 2.1 | 0.00194 | 1.1 | 0.1 | up | ubiquitin domain-containing protein 1, putative, expressed                                      |
| LOC_Os04g51770 | 2.1 | 0.00154 | 1.1 | 0.1 | up | expressed protein                                                                               |
| LOC_Os01g05064 | 2.1 | 0.00186 | 1.1 | 0.1 | up | expressed protein                                                                               |
| LOC_Os09g28489 | 2.1 | 0.01053 | 1.1 | 0.2 | up | expressed protein                                                                               |
| LOC_Os02g35530 | 2.1 | 0.01095 | 1.1 | 0.2 | up | OsFBK8 - F-box domain and kelch repeat containing protein, expressed                            |
| LOC_Os03g51690 | 2.1 | 0.02472 | 1.1 | 0.3 | up | Homeobox domain containing protein, expressed                                                   |
| LOC_Os01g52410 | 2.1 | 0.00128 | 1.1 | 0.1 | up | myb-like DNA-binding domain containing protein, putative, expressed                             |
| LOC_Os07g05510 | 2.1 | 0.02248 | 1.1 | 0.3 | up | expressed protein                                                                               |
| LOC_Os06g42850 | 2.1 | 0.00123 | 1.1 | 0.1 | up | extracellular ligand-gated ion channel, putative, expressed                                     |
| LOC_Os06g48300 | 2.1 | 0.01319 | 1.1 | 0.3 | up | protein phosphatase 2C, putative, expressed                                                     |
| LOC_Os05g41120 | 2.1 | 0.00137 | 1.1 | 0.1 | up | endoplasmic reticulum-Golgi intermediate compartment protein 3, putative, expressed             |
| LOC_Os05g51420 | 2.1 | 0.02846 | 1.1 | 0.4 | up | hypersensitive-induced response protein, putative, expressed                                    |
| LOC_Os10g34450 | 2.1 | 0.00830 | 1.1 | 0.2 | up | expressed protein                                                                               |
| LOC_Os04g58810 | 2.1 | 0.01792 | 1.1 | 0.3 | up | CAF1 family ribonuclease containing protein, putative, expressed                                |
| LOC_Os02g33020 | 2.1 | 0.00709 | 1.1 | 0.2 | up | SOUL heme-binding protein, putative, expressed                                                  |
| LOC_Os01g40580 | 2.1 | 0.00506 | 1.1 | 0.1 | up | hypersensitive-induced response protein, putative, expressed                                    |
| LOC_Os01g43550 | 2.1 | 0.00488 | 1.1 | 0.1 | up | WRKY12, expressed                                                                               |
| LOC_Os12g17570 | 2.1 | 0.00667 | 1.1 | 0.2 | up | GDLS-like lipase/acylhydrolase, putative, expressed                                             |
| LOC_Os02g26160 | 2.1 | 0.00962 | 1.1 | 0.2 | up | receptor lectin kinase like protein, putative, expressed                                        |
| LOC_Os03g61540 | 2.1 | 0.00732 | 1.1 | 0.2 | up | lipase class 3 family protein, putative, expressed                                              |
| LOC_Os01g17010 | 2.1 | 0.00483 | 1.1 | 0.1 | up | phospholipid-transporting ATPase, putative, expressed                                           |
| LOC_Os09g27410 | 2.1 | 0.00101 | 1.1 | 0.0 | up | expressed protein                                                                               |
| LOC_Os07g10420 | 2.1 | 0.00121 | 1.1 | 0.0 | up | expressed protein                                                                               |
| LOC_Os01g53840 | 2.1 | 0.00217 | 1.0 | 0.1 | up | protein kinase family protein, putative, expressed                                              |
| LOC_Os12g10880 | 2.1 | 0.00635 | 1.0 | 0.2 | up | expressed protein                                                                               |
| LOC_Os09g02540 | 2.1 | 0.01278 | 1.0 | 0.2 | up | expressed protein                                                                               |
| LOC_Os05g39320 | 2.1 | 0.00353 | 1.0 | 0.1 | up | thiamine pyrophosphate enzyme, C-terminal TPP binding domain containing protein, expressed      |
| LOC_Os02g03410 | 2.1 | 0.00128 | 1.0 | 0.1 | up | CAMK_CAMK_like.12 - CAMK includes calcium/calmodulin dependent protein kinases, expressed       |
| LOC_Os10g37830 | 2.1 | 0.00211 | 1.0 | 0.1 | up | OsFBX391 - F-box domain containing protein, expressed                                           |
| LOC_Os09g25570 | 2.1 | 0.01373 | 1.0 | 0.3 | up | aspartic proteinase, putative, expressed                                                        |
| LOC_Os11g39190 | 2.1 | 0.00643 | 1.0 | 0.2 | up | NB-ARC domain containing protein, putative, expressed                                           |
| LOC_Os02g10210 | 2.1 | 0.00590 | 1.0 | 0.2 | up | expressed protein                                                                               |
| LOC_Os09g29510 | 2.1 | 0.00538 | 1.0 | 0.2 | up | OsWAK80 - OsWAK receptor-like protein kinase, expressed                                         |
| LOC_Os07g14310 | 2.1 | 0.00397 | 1.0 | 0.1 | up | expressed protein                                                                               |
| LOC_Os07g26210 | 2.1 | 0.01573 | 1.0 | 0.3 | up | non-lysosomal glucosylceramidase, putative, expressed                                           |
| LOC_Os04g52500 | 2.1 | 0.00620 | 1.0 | 0.2 | up | lecithine cholesterol acyltransferase, putative, expressed                                      |
| LOC_Os01g39020 | 2.1 | 0.01012 | 1.0 | 0.2 | up | HSF-type DNA-binding domain containing protein, expressed                                       |
| LOC_Os07g07760 | 2.1 | 0.00722 | 1.0 | 0.2 | up | expressed protein                                                                               |
| LOC_Os08g08700 | 2.1 | 0.00249 | 1.0 | 0.1 | up | ubiquitin family protein, putative, expressed                                                   |
| LOC_Os12g13340 | 2.1 | 0.00375 | 1.0 | 0.1 | up | expressed protein                                                                               |
| LOC_Os02g45380 | 2.1 | 0.00153 | 1.0 | 0.1 | up | MATE domain containing protein, expressed                                                       |
| LOC_Os02g27590 | 2.1 | 0.01323 | 1.0 | 0.2 | up | hypothetical protein                                                                            |
| LOC_Os08g10310 | 2.1 | 0.00105 | 1.0 | 0.0 | up | SHR5-receptor-like kinase, putative, expressed                                                  |
| LOC_Os12g37410 | 2.1 | 0.01801 | 1.0 | 0.3 | up | CPuORF5 - conserved peptide uORF-containing transcript, expressed                               |
| LOC_Os02g33710 | 2.0 | 0.00877 | 1.0 | 0.2 | up | decarboxylase, putative, expressed                                                              |
| LOC_Os01g67590 | 2.0 | 0.00795 | 1.0 | 0.2 | up | oligopeptidase, putative, expressed                                                             |
| LOC_Os08g42750 | 2.0 | 0.00446 | 1.0 | 0.1 | up | CAMK_CAMK_like.37 - CAMK includes calcium/calmodulin dependent protein kinases, expressed       |
| LOC_Os08g39370 | 2.0 | 0.00692 | 1.0 | 0.2 | up | citrate transporter, putative, expressed                                                        |
| LOC_Os03g03200 | 2.0 | 0.00271 | 1.0 | 0.1 | up | hydrolase, alpha/beta fold family protein, putative, expressed                                  |
| LOC_Os03g04530 | 2.0 | 0.00458 | 1.0 | 0.1 | up | cytochrome P450, putative, expressed                                                            |
| LOC_Os11g14520 | 2.0 | 0.00718 | 1.0 | 0.2 | up | expressed protein                                                                               |
| LOC_Os04g41960 | 2.0 | 0.00392 | 1.0 | 0.1 | up | NADP-dependent oxidoreductase, putative, expressed                                              |
| LOC_Os01g65900 | 2.0 | 0.00067 | 1.0 | 0.0 | up | chitin-inducible gibberellin-responsive protein, putative, expressed                            |
| LOC_Os09g15860 | 2.0 | 0.00145 | 1.0 | 0.1 | up | hypothetical protein                                                                            |
| LOC_Os07g08880 | 2.0 | 0.00102 | 1.0 | 0.0 | up | ES43 protein, putative, expressed                                                               |
| LOC_Os11g11090 | 2.0 | 0.00864 | 1.0 | 0.2 | up | expressed protein                                                                               |
| LOC_Os07g18180 | 2.0 | 0.00110 | 1.0 | 0.0 | up | expressed protein                                                                               |
| LOC_Os01g63250 | 2.0 | 0.00225 | 1.0 | 0.1 | up | Josephin, putative, expressed                                                                   |
| LOC_Os10g04020 | 2.0 | 0.00348 | 1.0 | 0.1 | up | OsFBX356 - F-box domain containing protein, expressed                                           |
| LOC_Os07g28820 | 2.0 | 0.00411 | 1.0 | 0.1 | up | ribonuclease 2-5A family protein, expressed                                                     |
| LOC_Os07g05370 | 2.0 | 0.00120 | 1.0 | 0.0 | up | TKL_IRAK_CrRLK1L-1.15 - The CrRLK1L-1 subfamily has homology to the CrRLK1L homolog, expressed  |
| LOC_Os06g01360 | 2.0 | 0.00289 | 1.0 | 0.1 | up | homogentisate 1,2-dioxygenase, putative, expressed                                              |
| LOC_Os01g33400 | 2.0 | 0.01291 | 1.0 | 0.2 | up | helix-loop-helix DNA-binding domain containing protein, expressed                               |
| LOC_Os03g06490 | 2.0 | 0.00185 | 1.0 | 0.1 | up | expressed protein                                                                               |
| LOC_Os07g37620 | 2.0 | 0.00413 | 1.0 | 0.1 | up | fiber expressed protein, putative, expressed                                                    |
| LOC_Os09g31990 | 2.0 | 0.00586 | 1.0 | 0.2 | up | expressed protein                                                                               |
| LOC_Os06g19444 | 2.0 | 0.00430 | 1.0 | 0.1 | up | CCT/B-box zinc finger protein, putative, expressed                                              |
| LOC_Os07g40710 | 2.0 | 0.00724 | 1.0 | 0.2 | up | circadian clock coupling factor-related, putative, expressed                                    |
| LOC_Os09g26730 | 2.0 | 0.00312 | 1.0 | 0.1 | up | chaperonin, putative, expressed                                                                 |
| LOC_Os03g18490 | 2.0 | 0.00878 | 1.0 | 0.2 | up | RPGR, putative, expressed                                                                       |
| LOC_Os05g36290 | 2.0 | 0.00561 | 1.0 | 0.2 | up | actin, putative, expressed                                                                      |
| LOC_Os01g26130 | 2.0 | 0.00114 | 1.0 | 0.0 | up | expressed protein                                                                               |
| LOC_Os03g16350 | 2.0 | 0.00199 | 1.0 | 0.1 | up | DNA binding protein, putative, expressed                                                        |
| LOC_Os10g03690 | 2.0 | 0.00124 | 1.0 | 0.0 | up | OsFBX346 - F-box domain containing protein, expressed                                           |
| LOC_Os11g13934 | 2.0 | 0.02608 | 1.0 | 0.3 | up | expressed protein                                                                               |
| LOC_Os11g10510 | 2.0 | 0.00814 | 1.0 | 0.2 | up | dehydrogenase, putative, expressed                                                              |
| LOC_Os06g03690 | 2.0 | 0.00899 | 1.0 | 0.2 | up | RNA recognition motif containing protein, putative, expressed                                   |
| LOC_Os04g01960 | 2.0 | 0.00440 | 1.0 | 0.1 | up | expressed protein                                                                               |
| LOC_Os07g47350 | 2.0 | 0.01880 | 1.0 | 0.3 | up | potassium transporter, putative, expressed                                                      |
| LOC_Os05g05940 | 2.0 | 0.00150 | 1.0 | 0.1 | up | stress-related protein, putative, expressed                                                     |
| LOC_Os03g38540 | 2.0 | 0.00441 | 1.0 | 0.1 | up | folic acid binding protein, putative, expressed                                                 |
| LOC_Os10g31780 | 2.0 | 0.00145 | 1.0 | 0.1 | up | oxidoreductase, short chain dehydrogenase/reductase family domain containing protein, expressed |
| LOC_Os03g40260 | 2.0 | 0.00234 | 1.0 | 0.1 | up | Regulator of chromosome condensation domain containing protein, expressed                       |
| LOC_Os02g55190 | 2.0 | 0.00470 | 1.0 | 0.1 | up | expressed protein                                                                               |
| LOC_Os07g40300 | 2.0 | 0.01324 | 1.0 | 0.2 | up | ZOS7-10 - C2H2 zinc finger protein, expressed                                                   |
| LOC_Os08g34740 | 2.0 | 0.00265 | 1.0 | 0.1 | up | SGT1 protein, putative, expressed                                                               |

|                |     |         |     |     |    |                                                                                    |
|----------------|-----|---------|-----|-----|----|------------------------------------------------------------------------------------|
| LOC_Os07g48510 | 2.0 | 0.00206 | 1.0 | 0.1 | up | thioredoxin, putative, expressed                                                   |
| LOC_Os11g42800 | 2.0 | 0.00412 | 1.0 | 0.1 | up | kinesin motor domain containing protein, putative, expressed                       |
| LOC_Os03g26180 | 2.0 | 0.00117 | 1.0 | 0.0 | up | expressed protein                                                                  |
| LOC_Os02g32110 | 2.0 | 0.00343 | 1.0 | 0.1 | up | exostosin family domain containing protein, expressed                              |
| LOC_Os05g37140 | 2.0 | 0.00119 | 1.0 | 0.0 | up | 2Fe-2S iron-sulfur cluster binding domain containing protein, expressed            |
| LOC_Os11g10770 | 2.0 | 0.00174 | 1.0 | 0.1 | up | disease resistance protein RGA3, putative, expressed                               |
| LOC_Os01g12660 | 2.0 | 0.01015 | 1.0 | 0.2 | up | AAA-type ATPase family protein, putative, expressed                                |
| LOC_Os01g03060 | 2.0 | 0.00440 | 1.0 | 0.1 | up | splicing factor, putative, expressed                                               |
| LOC_Os07g41200 | 2.0 | 0.00136 | 1.0 | 0.1 | up | expressed protein                                                                  |
| LOC_Os01g70590 | 2.0 | 0.00163 | 1.0 | 0.1 | up | DUF567 domain containing protein, putative, expressed                              |
| LOC_Os01g58700 | 2.0 | 0.00128 | 1.0 | 0.1 | up | expressed protein                                                                  |
| LOC_Os05g07070 | 2.0 | 0.00138 | 1.0 | 0.1 | up | zinc finger, C3HC4 type domain containing protein, expressed                       |
| LOC_Os06g45090 | 2.0 | 0.00181 | 1.0 | 0.1 | up | expressed protein                                                                  |
| LOC_Os03g14140 | 2.0 | 0.00284 | 1.0 | 0.1 | up | POE116 - Pollen Ole e 1 allergen and extensin family protein precursor, expressed  |
| LOC_Os05g32474 | 2.0 | 0.00306 | 1.0 | 0.1 | up | expressed protein                                                                  |
| LOC_Os04g28710 | 2.0 | 0.00575 | 1.0 | 0.2 | up | hypothetical protein                                                               |
| LOC_Os04g44354 | 2.0 | 0.00942 | 1.0 | 0.2 | up | UDP-glucuronosyl and UDP-glucosyl transferase domain containing protein, expressed |
| LOC_Os05g34010 | 2.0 | 0.00185 | 1.0 | 0.1 | up | peptide transporter PTR2, putative, expressed                                      |
| LOC_Os01g09120 | 2.0 | 0.00159 | 1.0 | 0.1 | up | Twin LOV 1, putative, expressed                                                    |
| LOC_Os08g29160 | 2.0 | 0.00170 | 1.0 | 0.1 | up | 5-AMP-activated protein kinase beta-1 subunit-related, putative, expressed         |
